# Supplementary material for: Pyrene-based metal–organic framework NU-1000 photocatalysed atom-transfer radical addition for iodoperfluoroalkylation and (Z)-selective perfluoroalkylation of olefins by visible-light irradiation
Source: Royal Society of Chemistry journal article supplement (doi:10.1039/c8ra06181e), 2018-01-01

*Electronic Supplementary Information (ESI)*

**Pyrene-based metal-organic framework NU-1000 photocatalysed  
atom-transfer radical addition for iodoperfluoroalkylation and (Z)-  
selective perfluoroalkylation of olefins by visible-light irradiation**

Tiexin Zhang,<sup>\*a</sup> Pengfang Wang,<sup>a</sup> Zirui Gao,<sup>a</sup> Yang An,<sup>a</sup> Cheng He<sup>a</sup> and Chunying Duan <sup>\*ab</sup>

<sup>a</sup>State Key Laboratory of Fine Chemicals, Dalian University of Technology, Dalian 116024, China.

<sup>b</sup>Collaborative Innovation Center of Chemical Science and Engineering, Tianjin 300071, China.

\*Corresponding author: Phone and Fax: +86-411-84986476;

E-mail address: [zhangtiexin@dlut.edu.cn](mailto:zhangtiexin@dlut.edu.cn); cyduan@dlut.edu.cn

| <b>Contents</b>                          | <b>Page</b> |
|------------------------------------------|-------------|
| NMR Spectra of <b>3a</b>                 | 1~2         |
| NMR Spectra of <b>3b</b>                 | 2~3         |
| NMR Spectra of <b>3c</b>                 | 4~5         |
| NMR Spectra of <b>3d</b>                 | 5~6         |
| NMR Spectra of <b>3e</b>                 | 7~8         |
| NMR Spectra of <b>3f</b>                 | 8~9         |
| NMR Spectra of <b>3g</b>                 | 10~11       |
| HRMS Spectra of <b>3g</b>                | 11          |
| NMR Spectra of <b>4h</b> and <b>4h'</b>  | 12~13       |
| HRMS Spectra of <b>4h</b> and <b>4h'</b> | 13          |
| NMR Spectra of <b>3i</b>                 | 14~15       |
| NMR Spectra of <b>3j</b>                 | 15~16       |
| NMR Spectra of <b>(E)-6a</b>             | 16~18       |
| NMR Spectra of <b>(Z)-6a</b>             | 18~19       |
| NMR Spectra of <b>(E)-6b</b>             | 20~21       |
| NMR Spectra of <b>3m</b>                 | 22~23       |
| HRMS Spectra of <b>3m</b>                | 23          |
| NMR Spectra of <b>(Z)-7a</b>             | 24~25       |
| NMR Spectra of <b>(Z)-7b</b>             | 26~27       |
| NMR Spectra of <b>(Z)-7c</b>             | 28~29       |
| HRMS Spectra of <b>(Z)-7c</b>            | 30          |

### 3a-<sup>1</sup>H

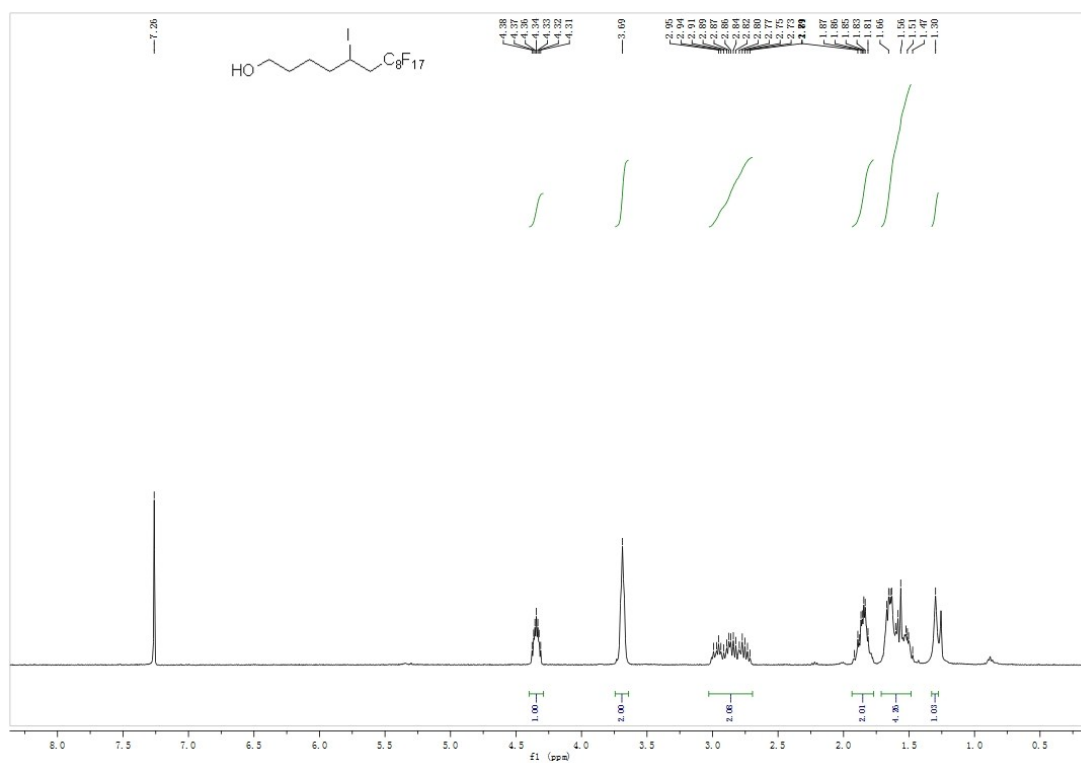

### 3a-<sup>13</sup>C

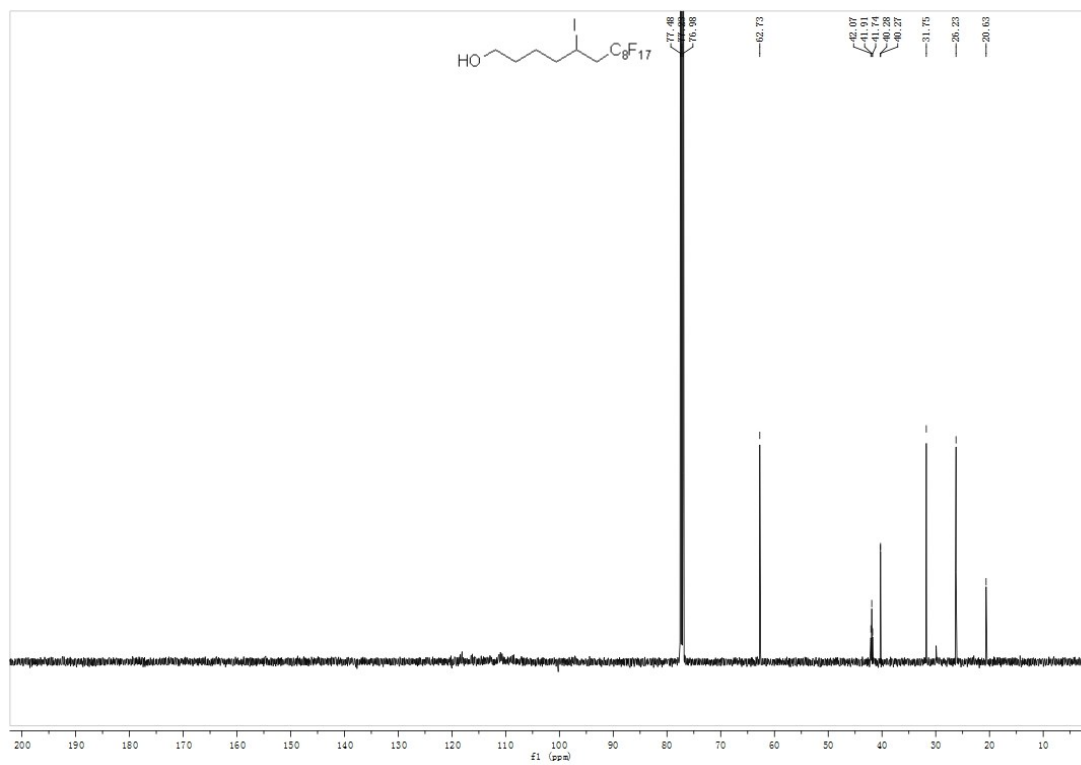

### 3a-<sup>19</sup>F

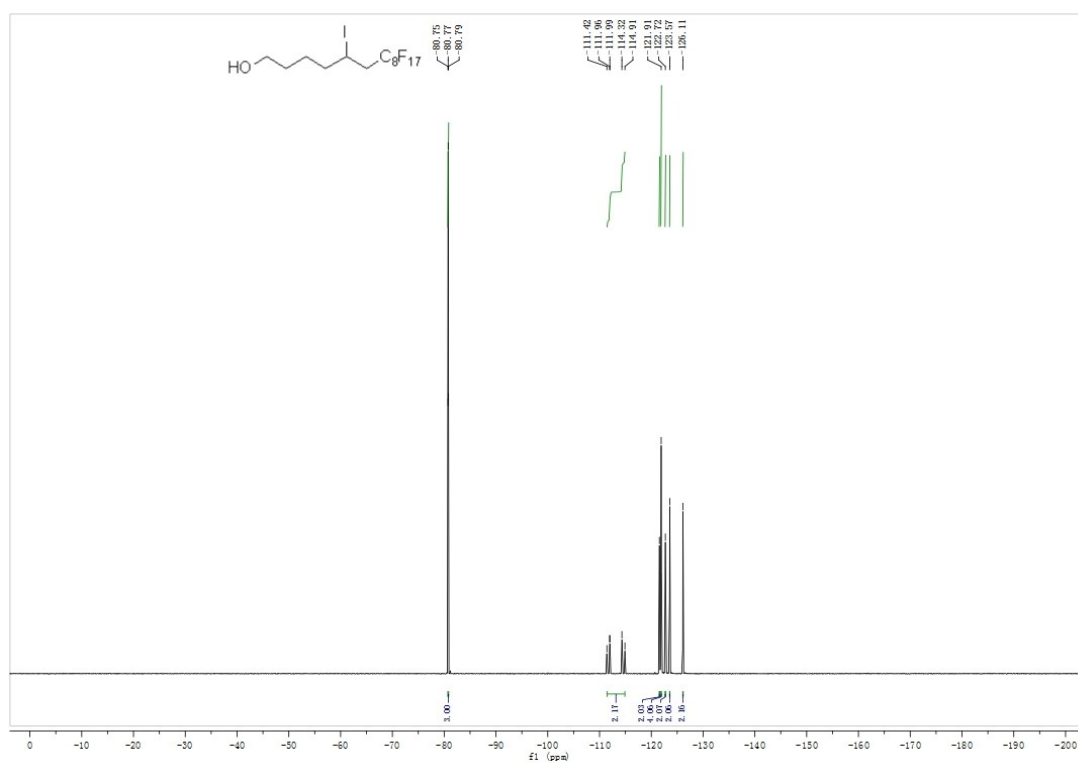

### 3b-<sup>1</sup>H

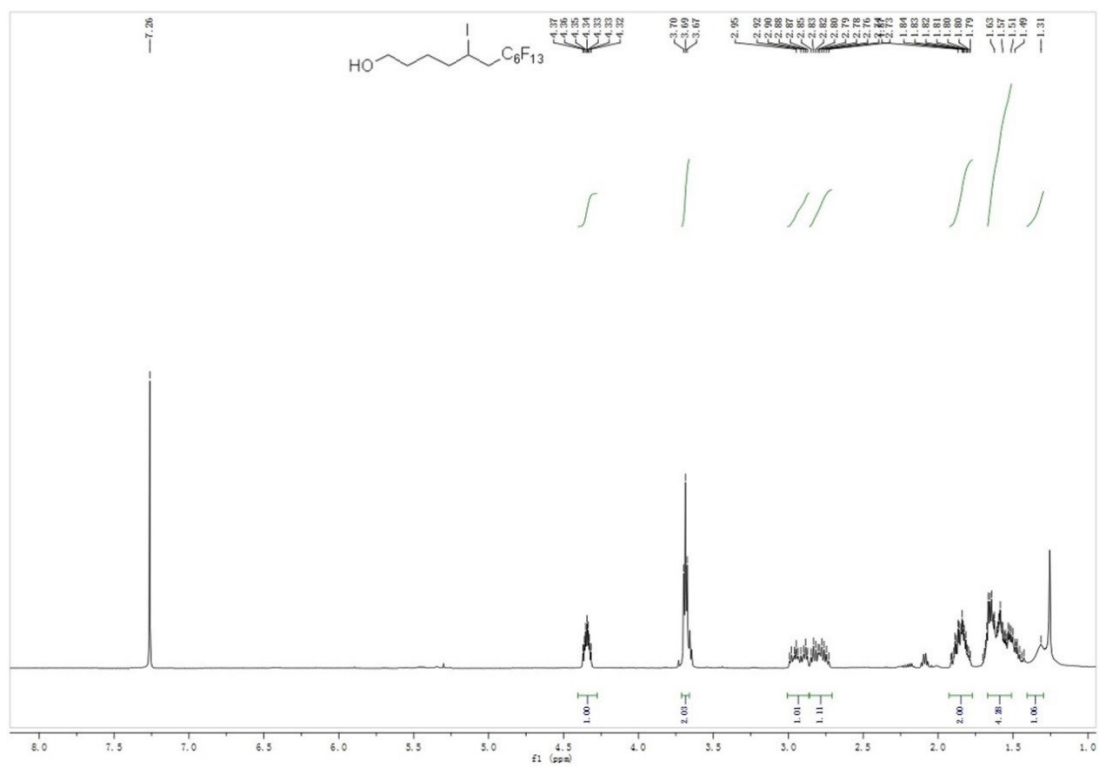

### 3b-<sup>13</sup>C

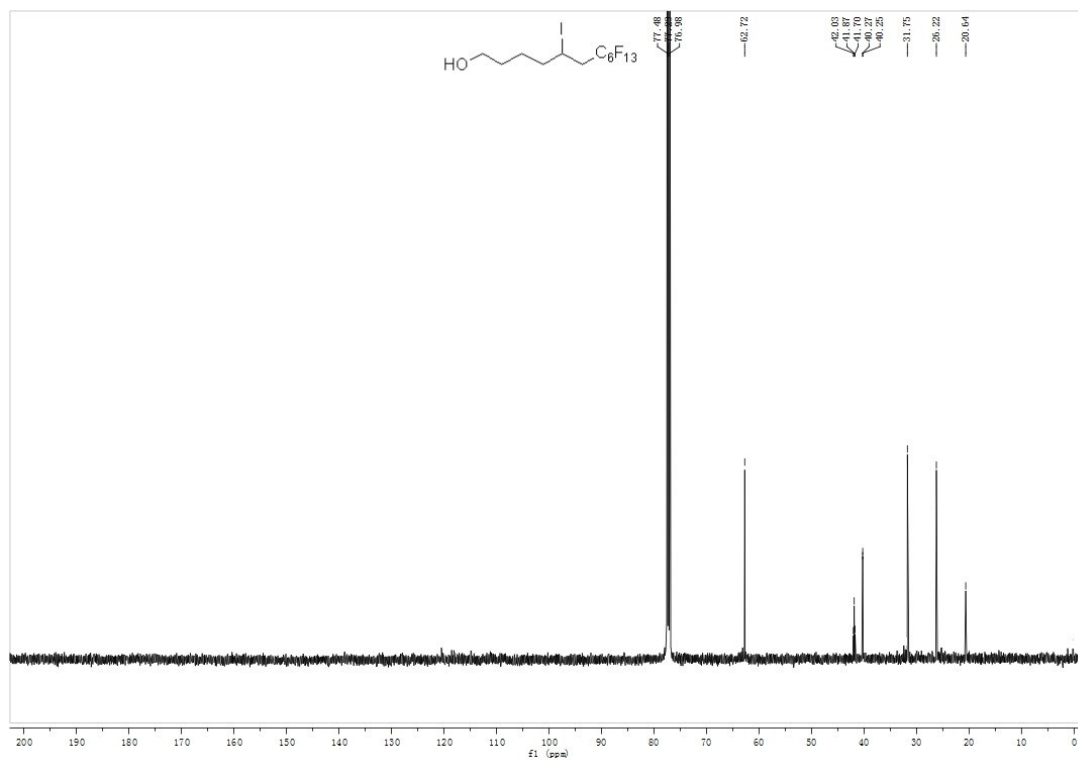

### 3b-<sup>19</sup>F

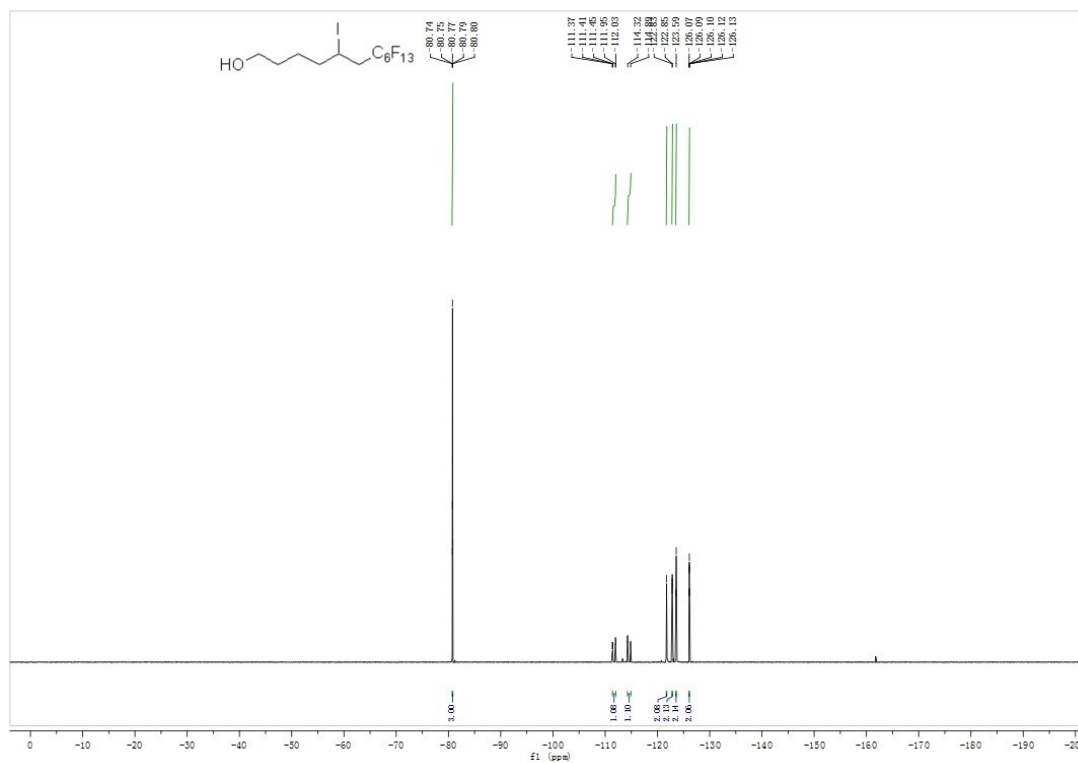

### 3c-<sup>1</sup>H

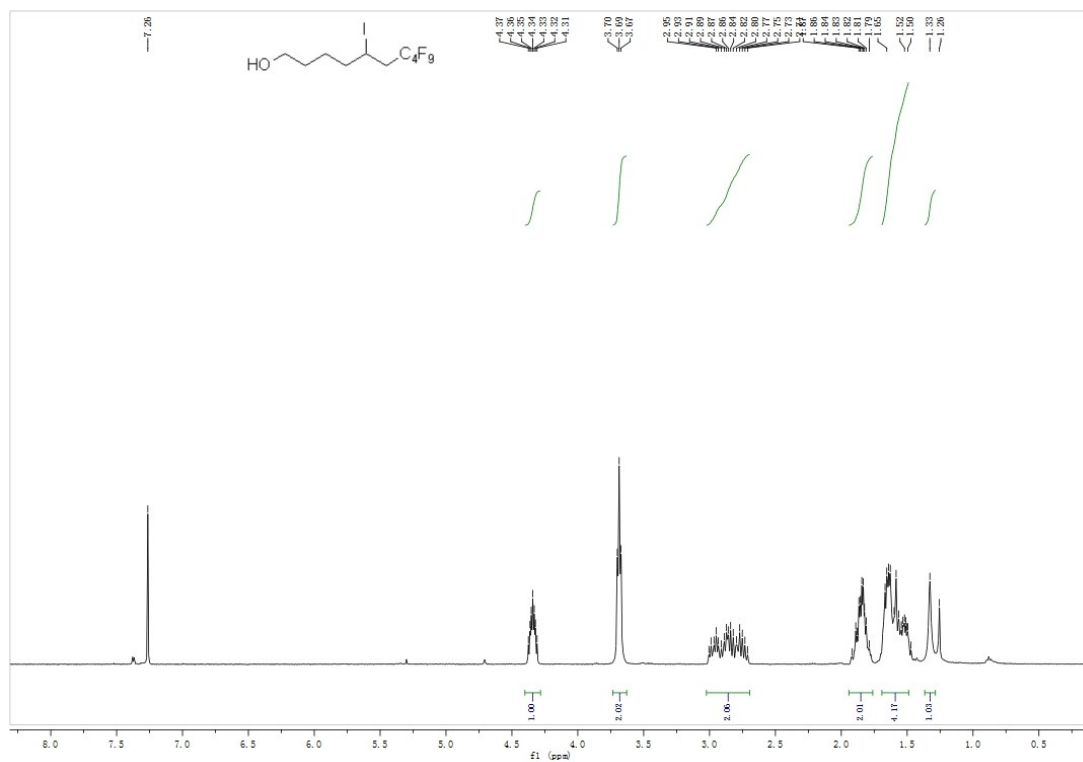

### 3c-<sup>13</sup>C

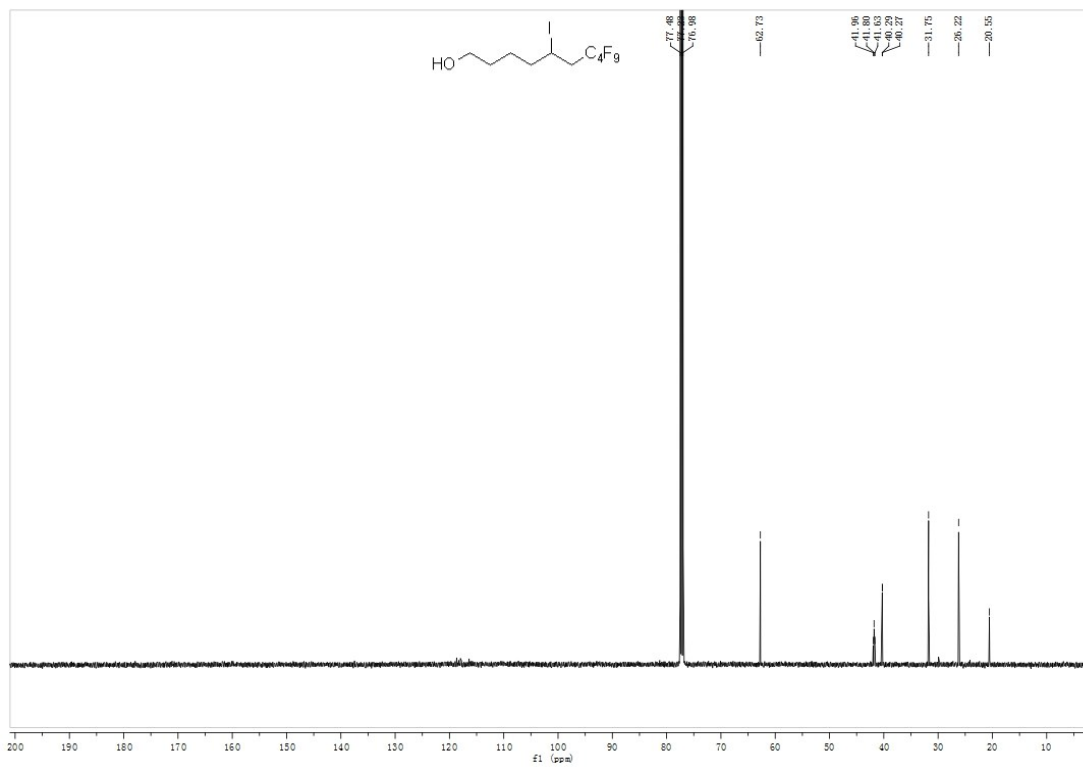

### 3c-<sup>19</sup>F

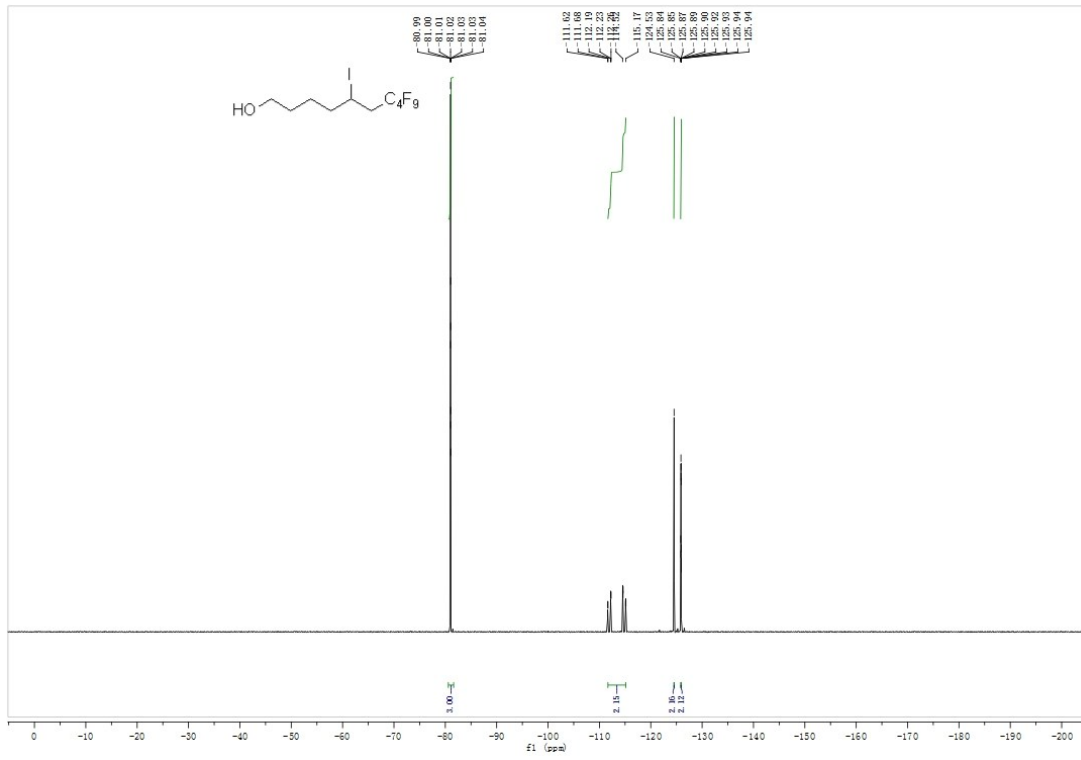

### 3d-<sup>1</sup>H

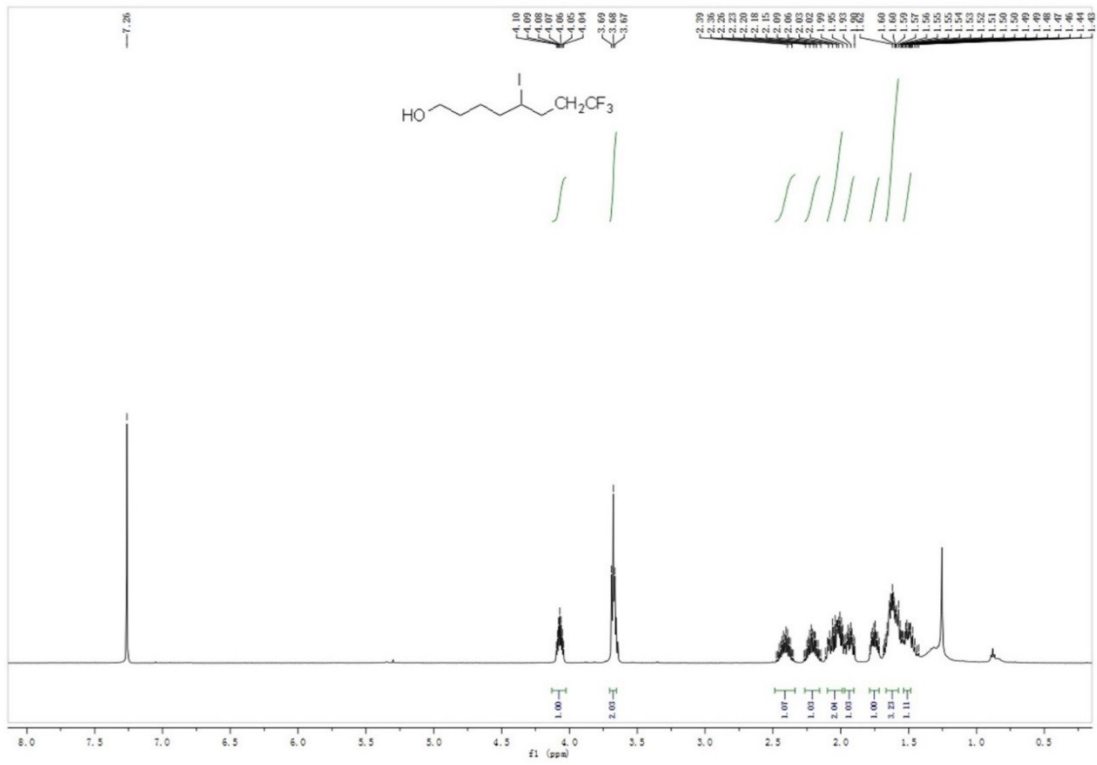

### 3d-<sup>13</sup>C

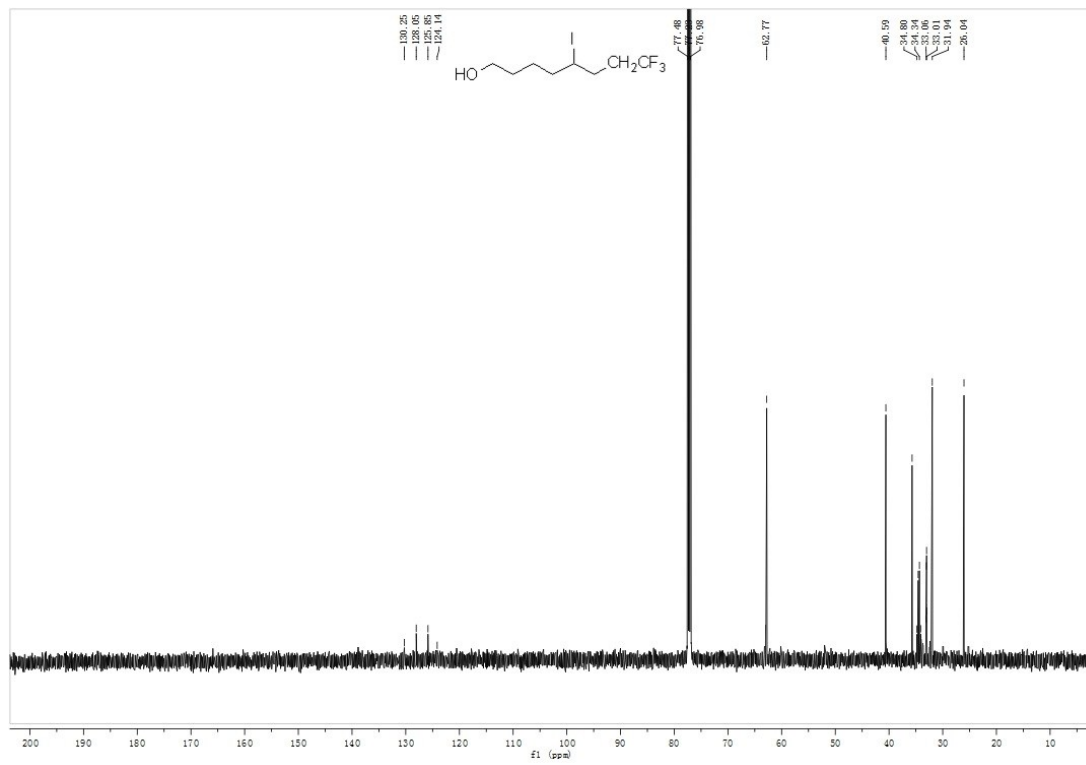

### 3d-<sup>19</sup>F

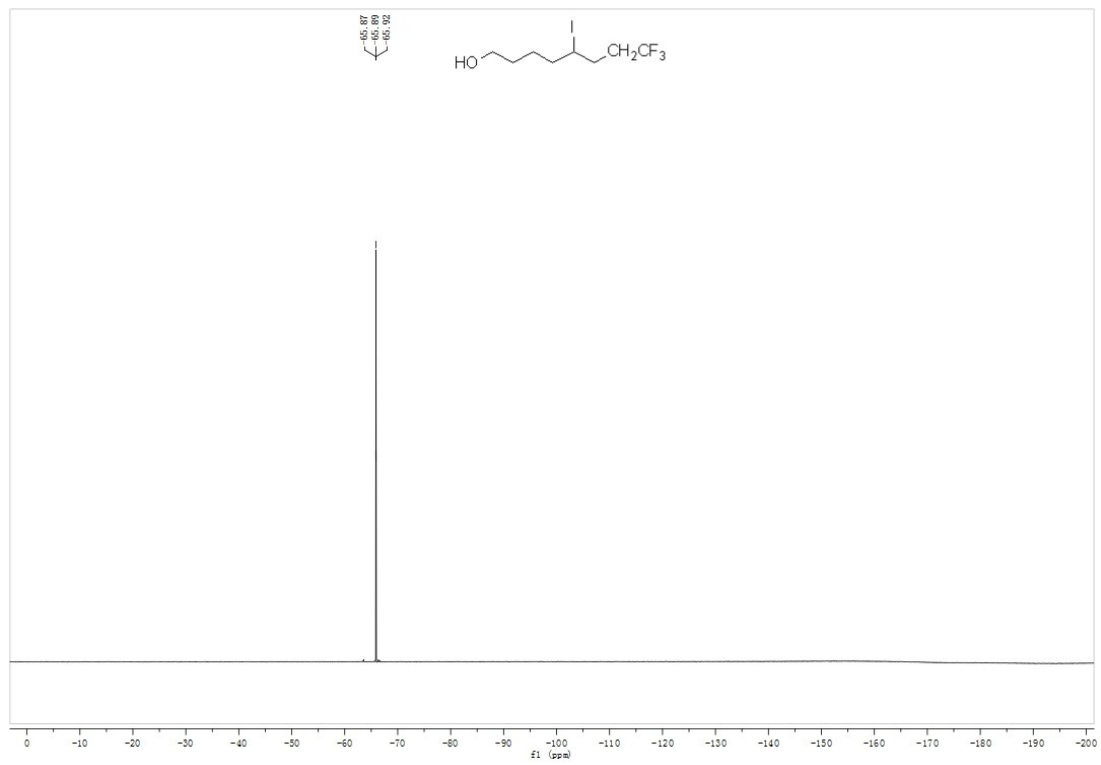

### 3e-<sup>1</sup>H

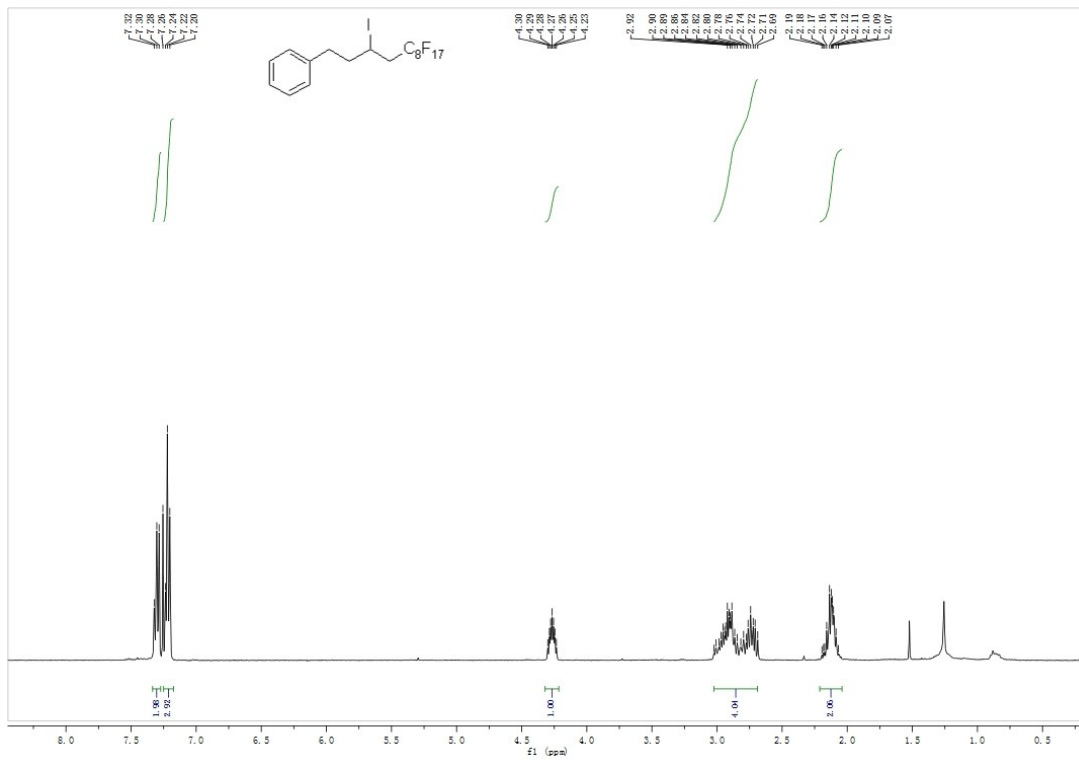

### 3e-<sup>13</sup>C

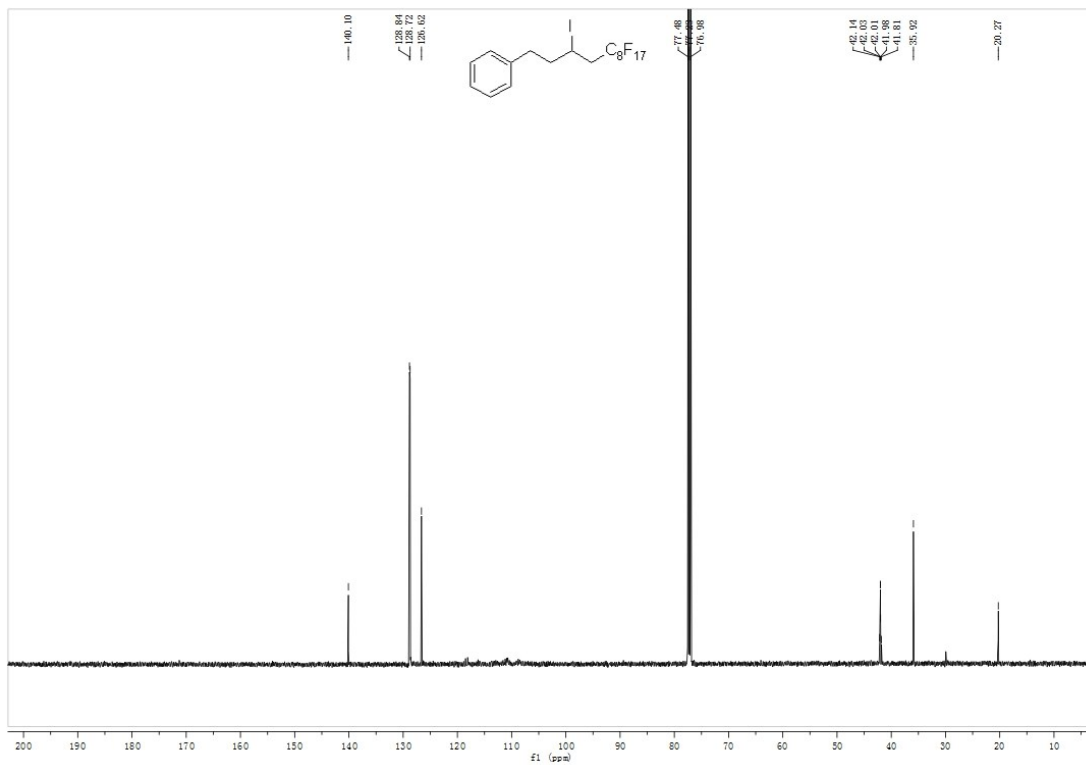



### 3e-<sup>19</sup>F

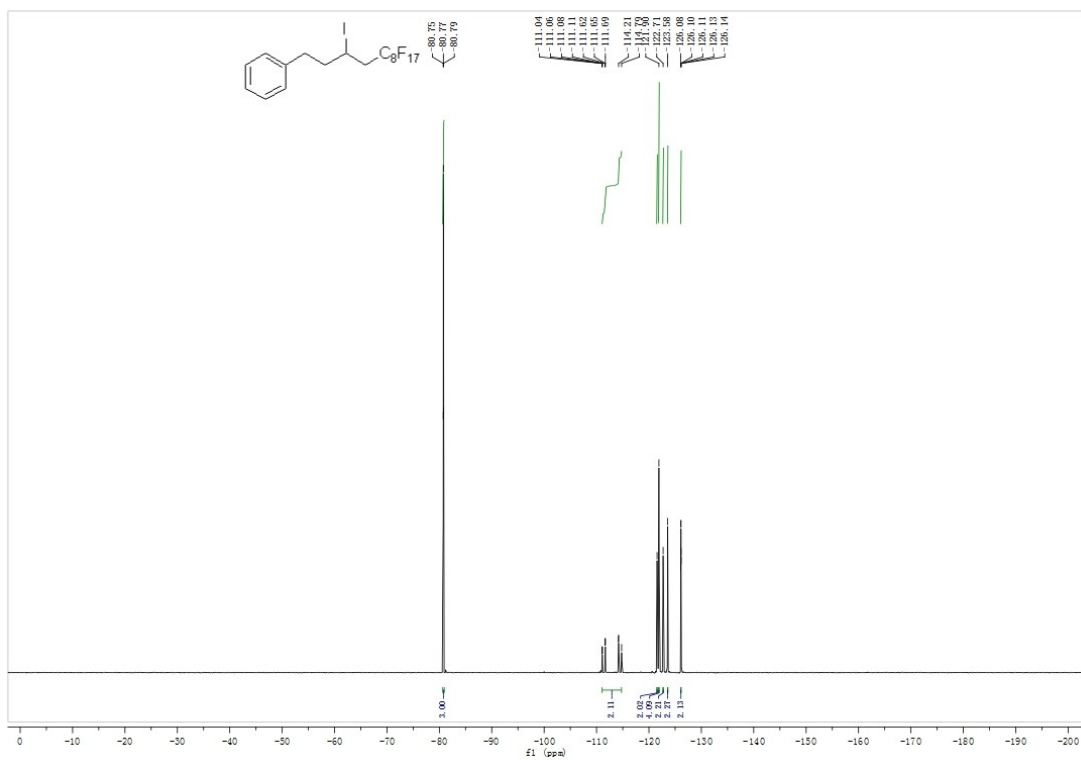

### 3f-<sup>1</sup>H

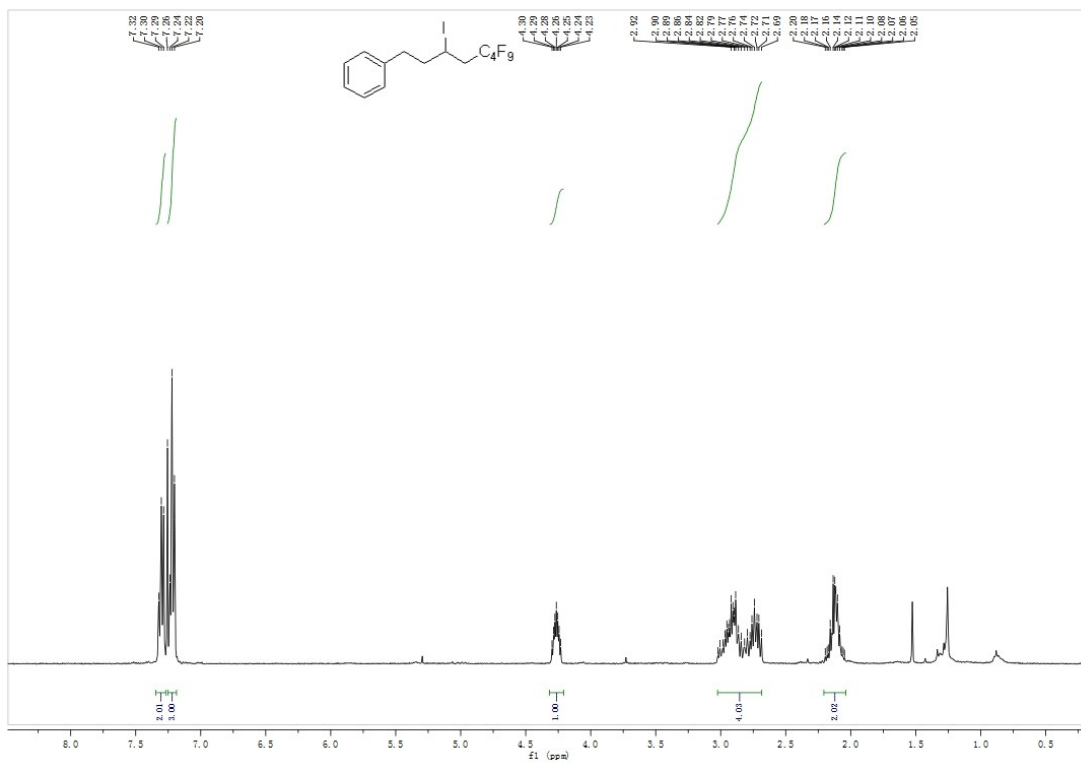

### 3f-<sup>13</sup>C

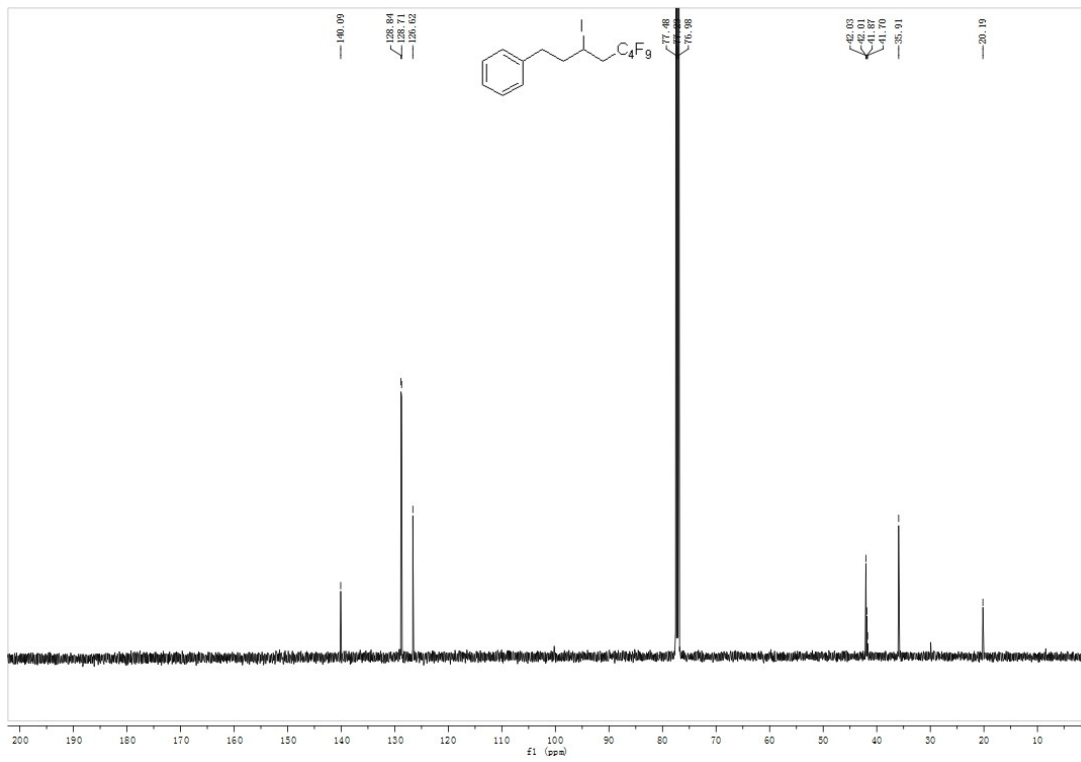

### 3f-<sup>19</sup>F

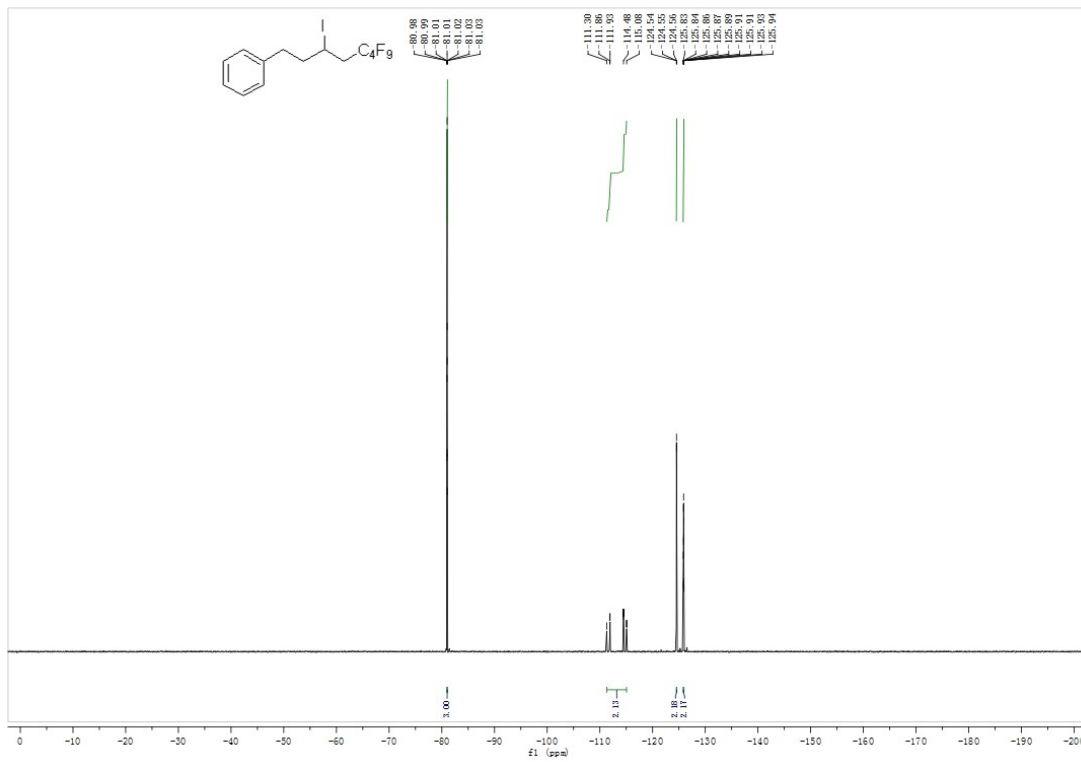

### 3g-<sup>1</sup>H

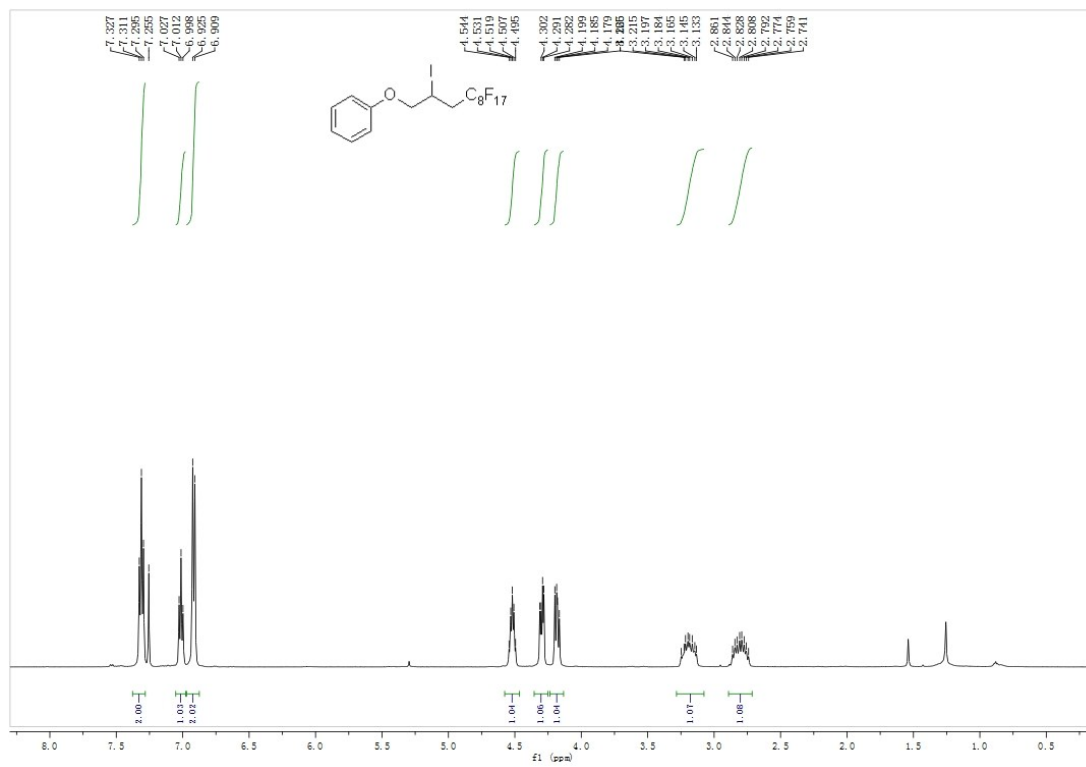

### 3g-<sup>13</sup>C

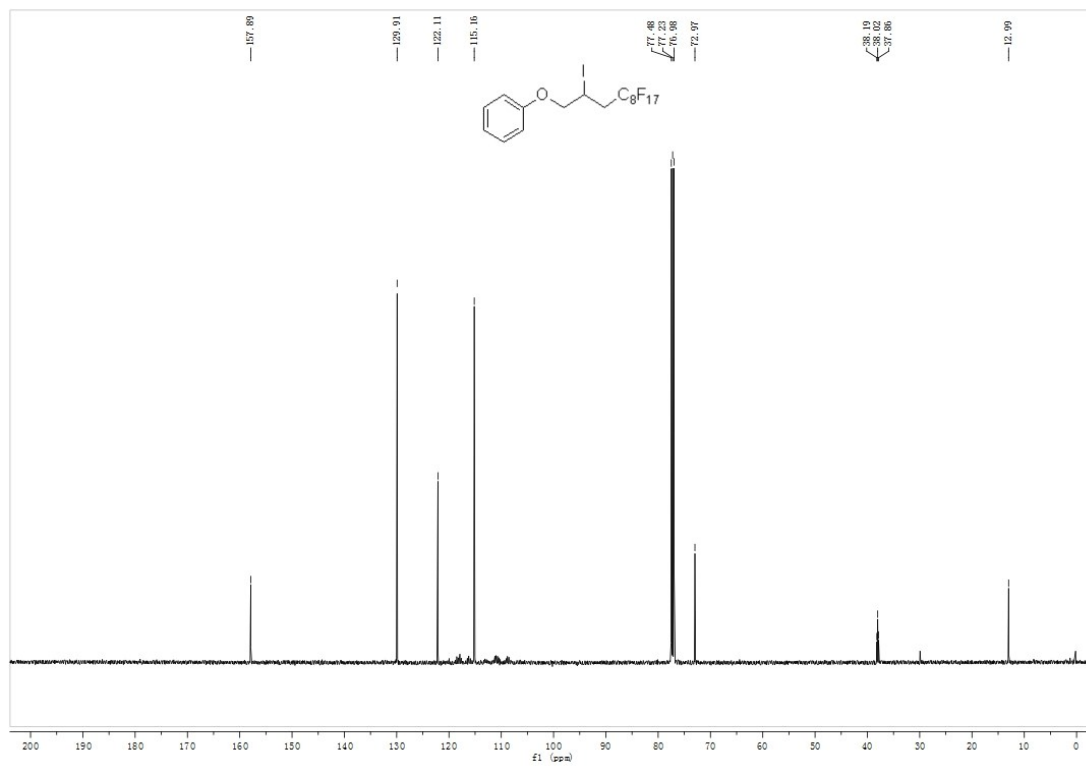

### 3g-<sup>19</sup>F

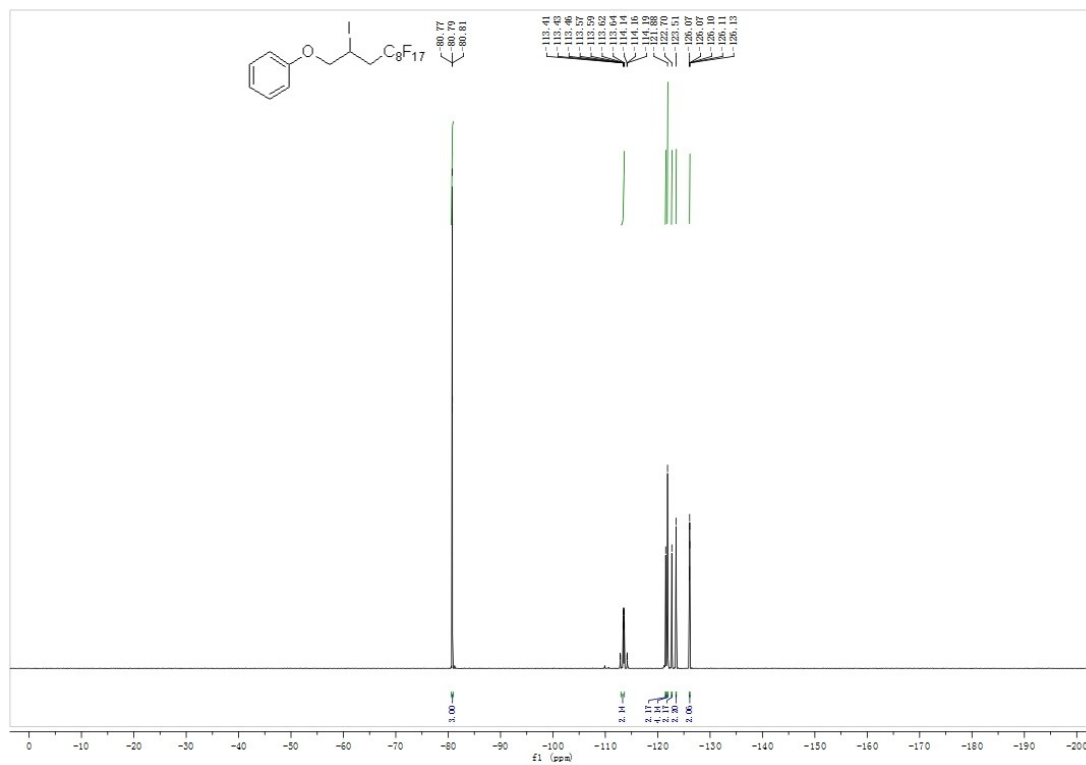

### 3g-HRMS (EI)

ztx180907-1 251 (4.184) Cm (251:264-110:144)

TOF MS EI+  
7.14e4

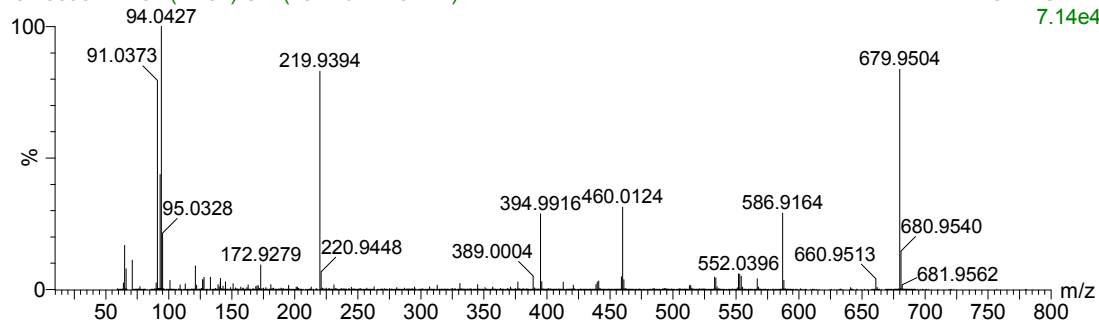

### 4h and 4h'-<sup>1</sup>H

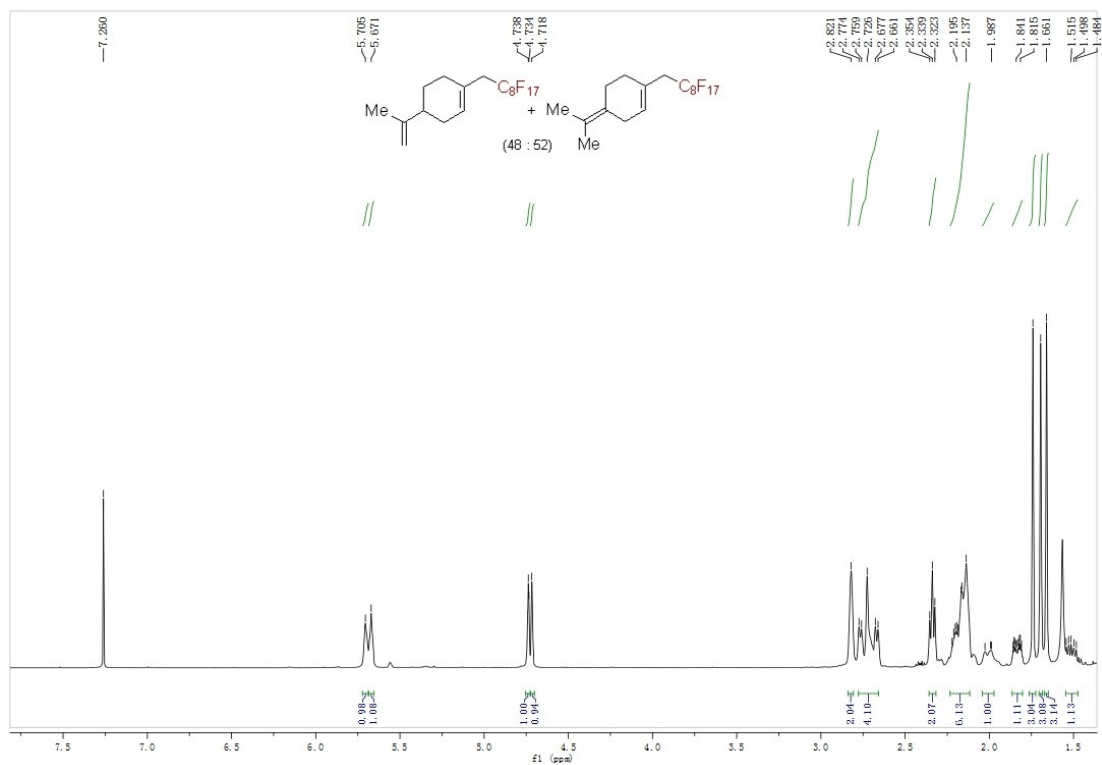

### 4h and 4h'-<sup>13</sup>C

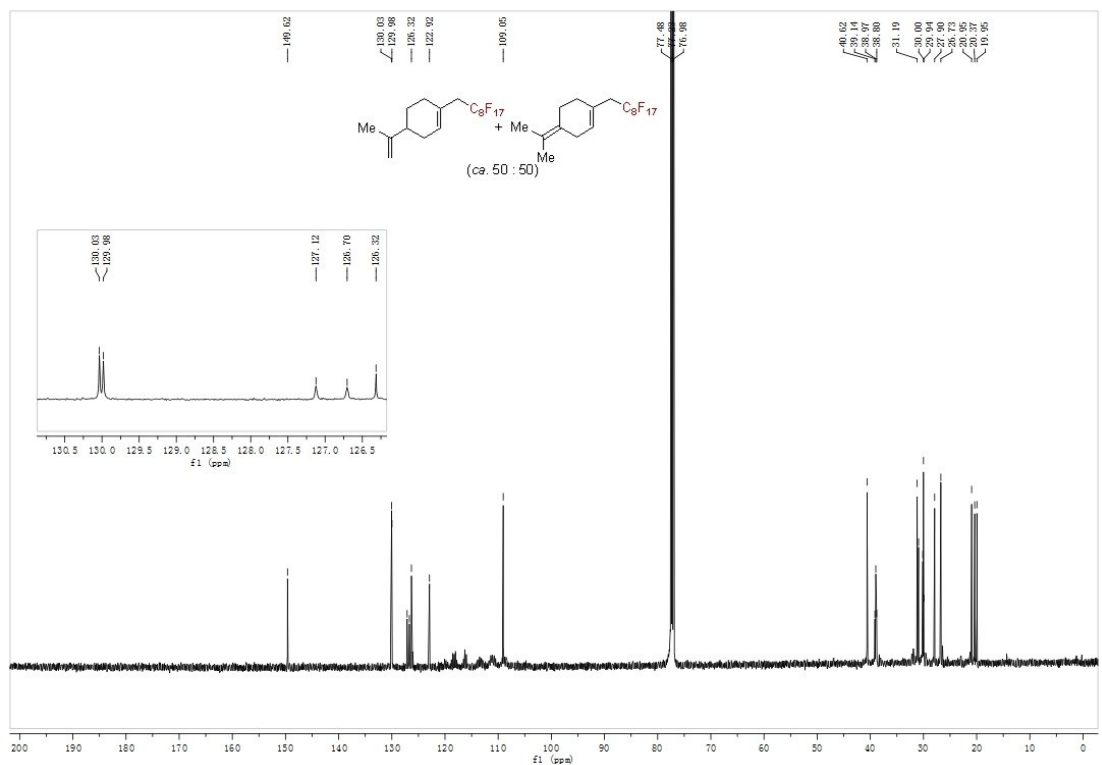



### 3i-<sup>1</sup>H

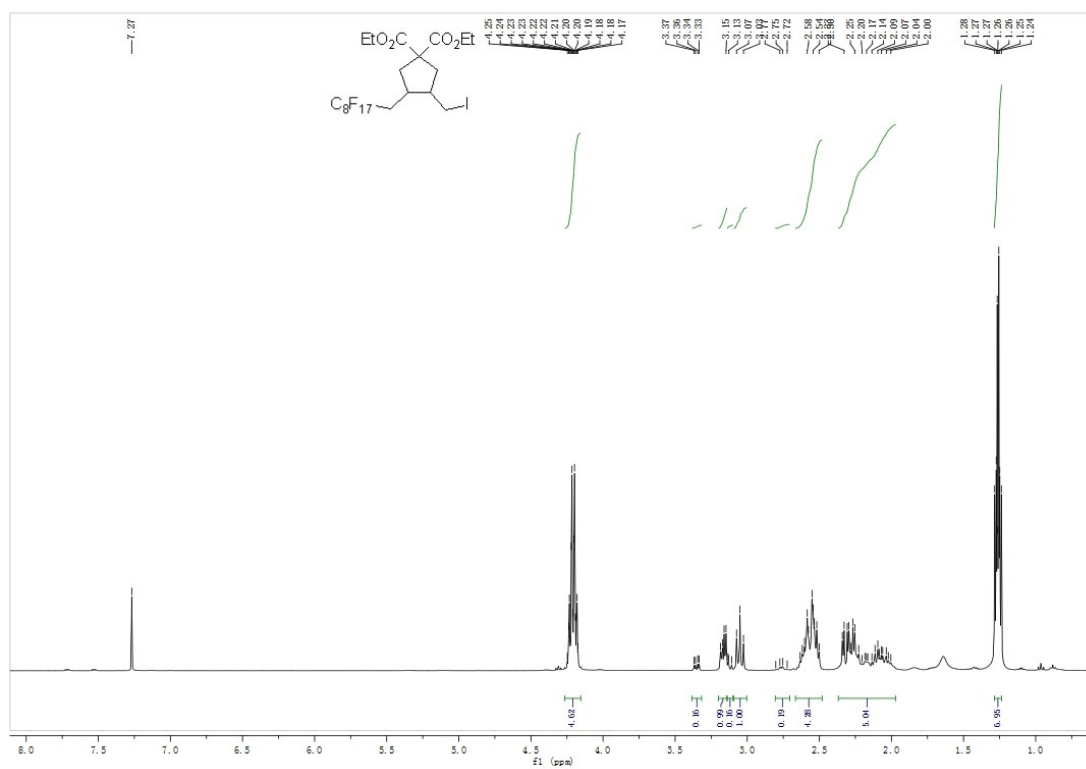

### 3i-<sup>13</sup>C

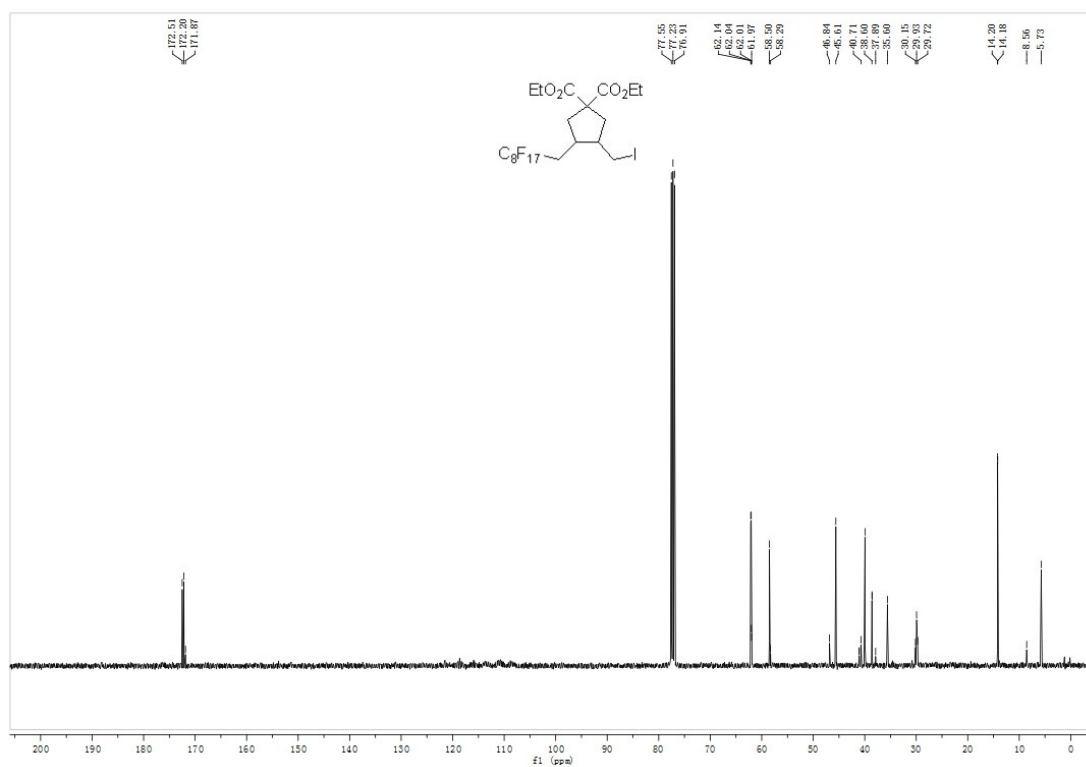





### 3j-<sup>13</sup>C

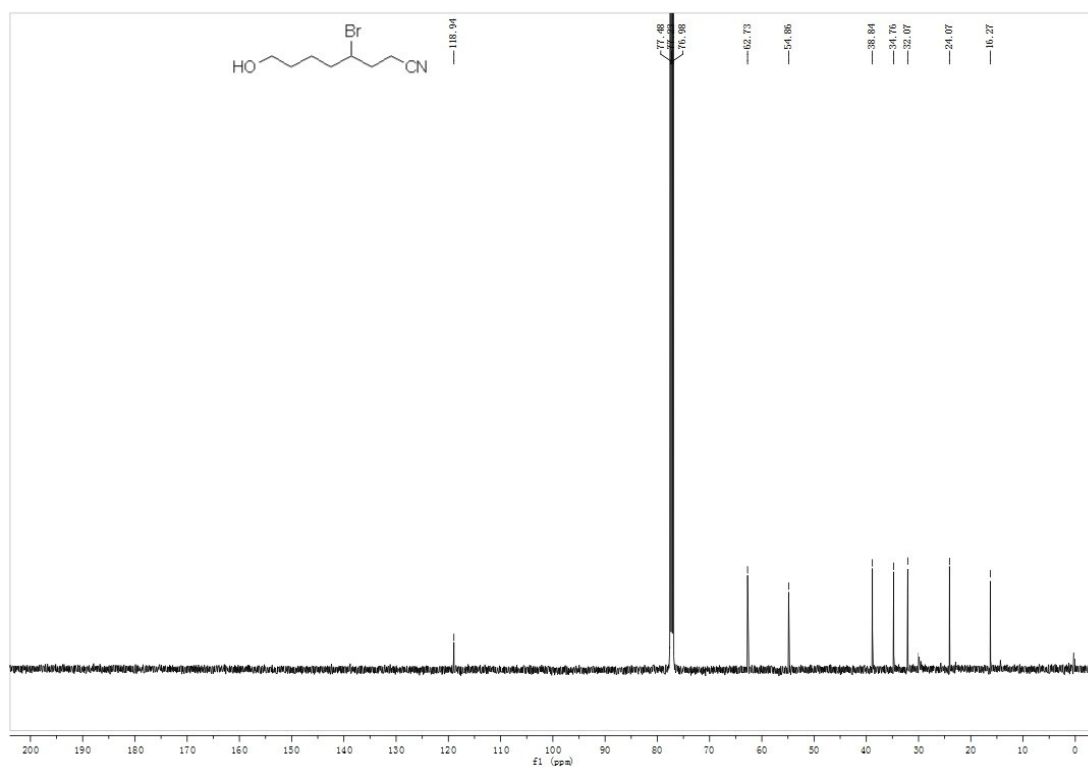

### (E)-6a-<sup>1</sup>H

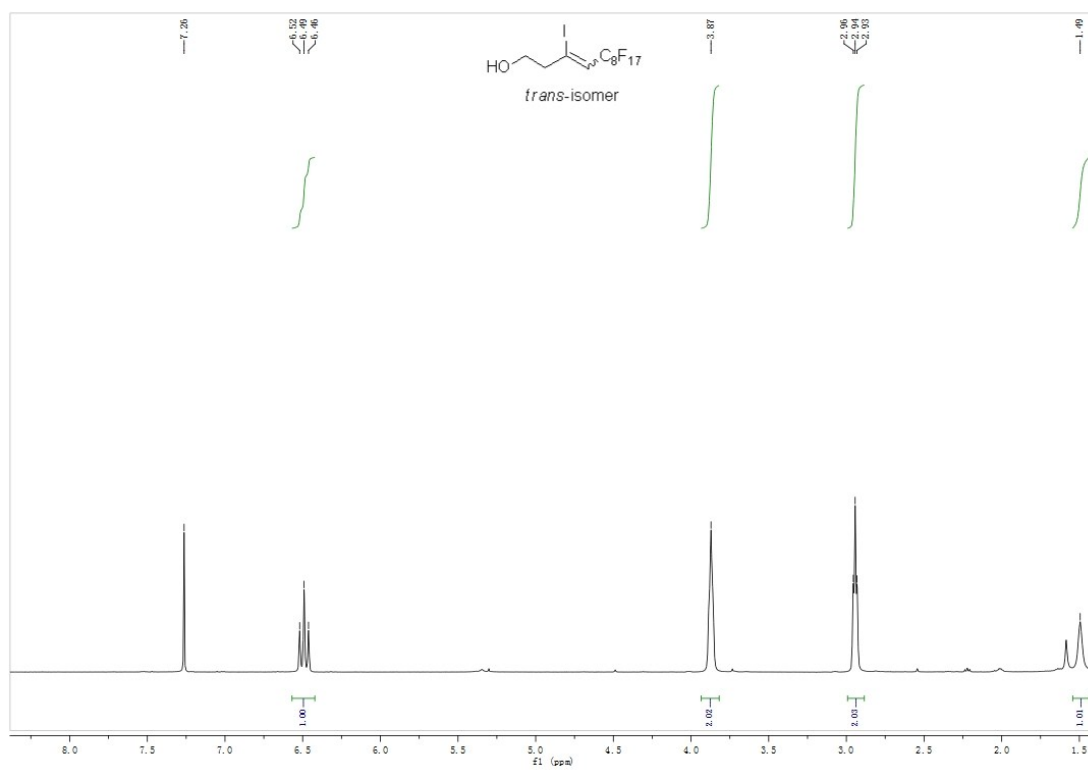

**(E)-6a-<sup>13</sup>C**

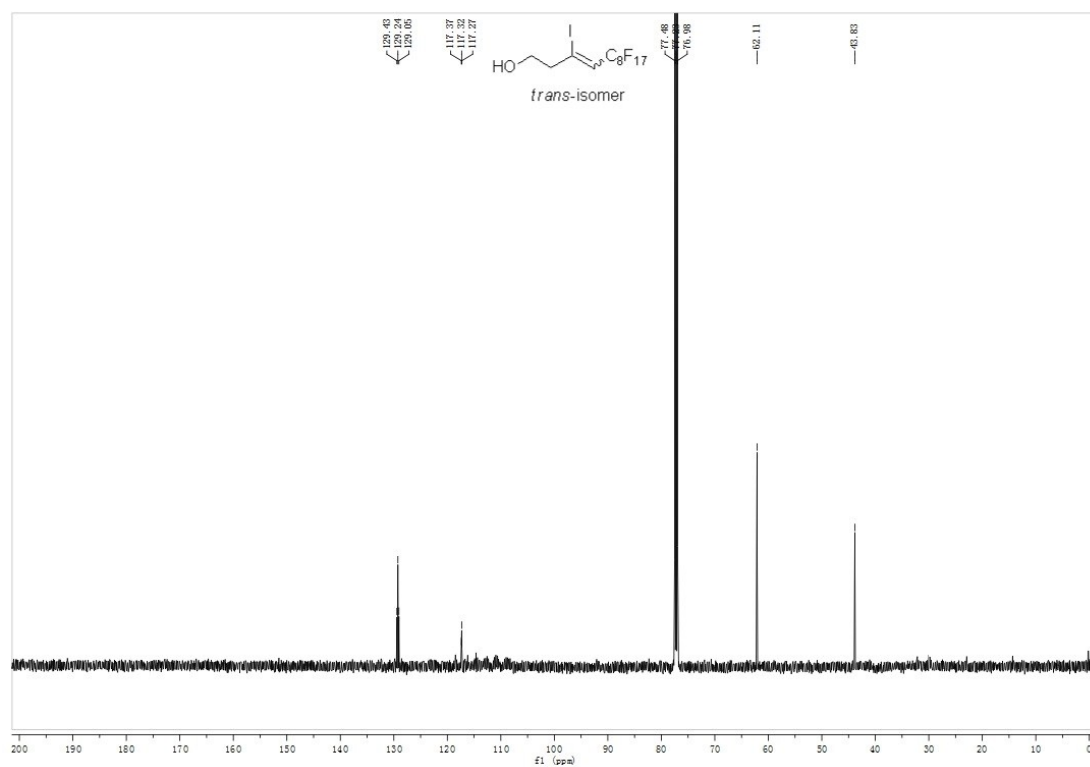

**(E)-6a-<sup>19</sup>F**

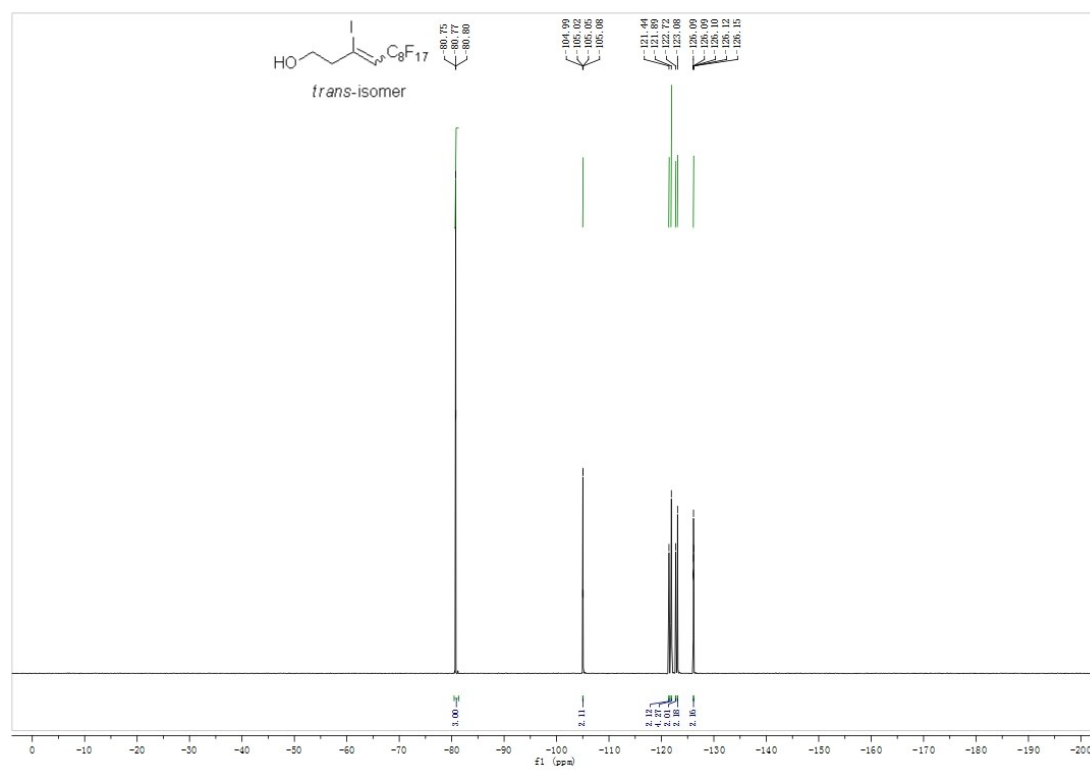

### (E)-6a-2D-NOESY

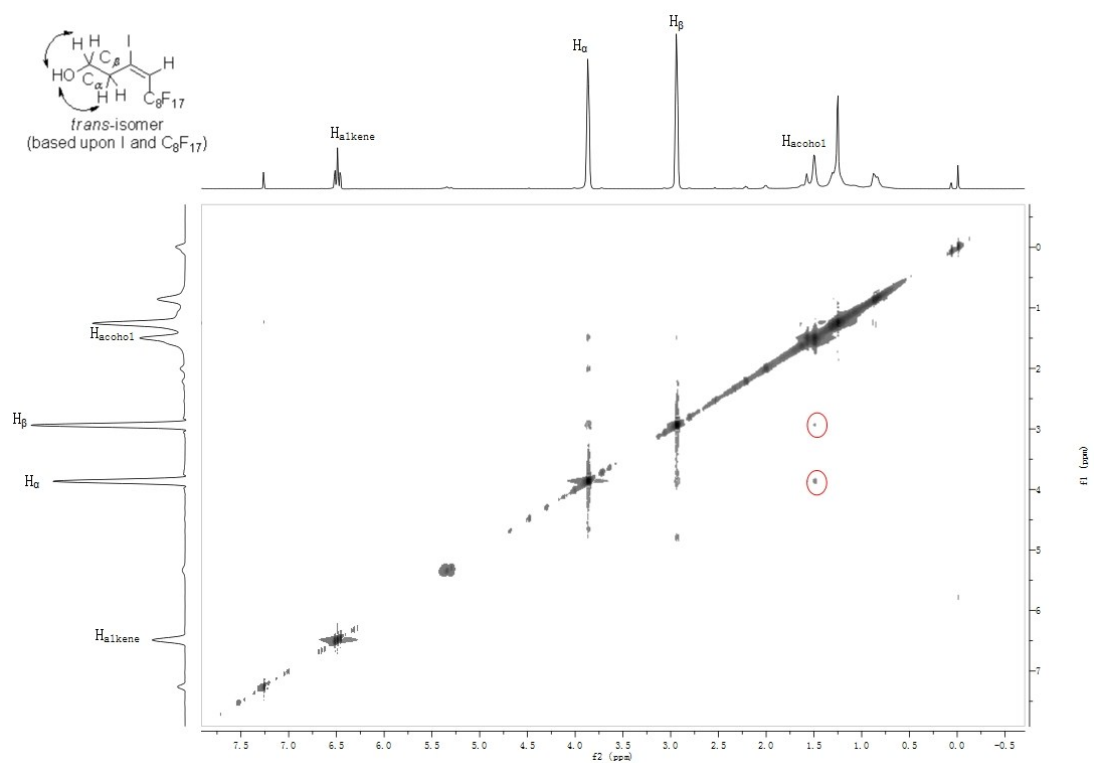

### (Z)-6a-<sup>1</sup>H

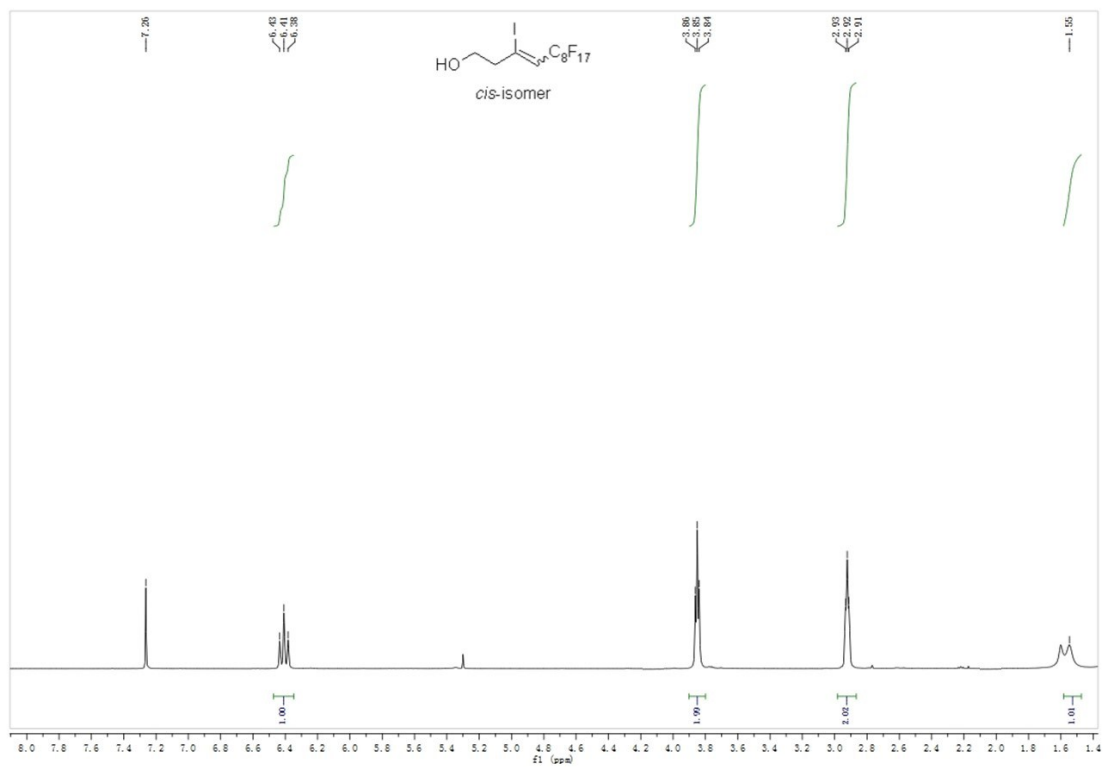

**(Z)-6a-<sup>13</sup>C**

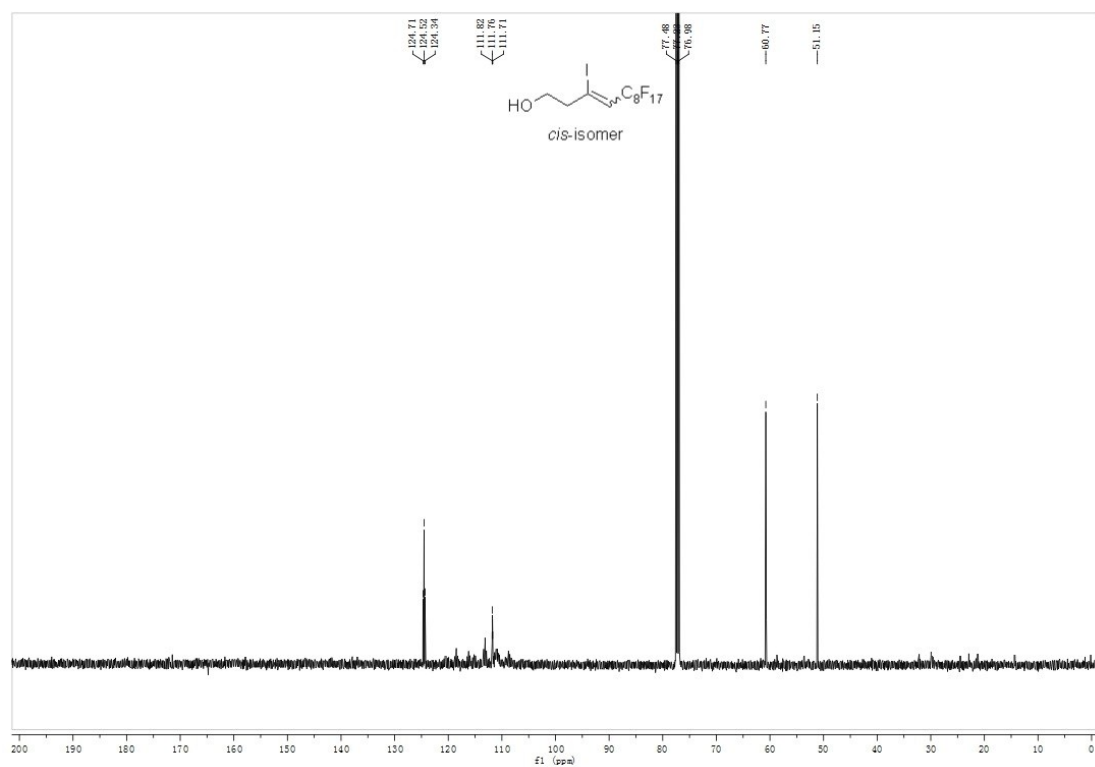

**(Z)-6a-<sup>19</sup>F**

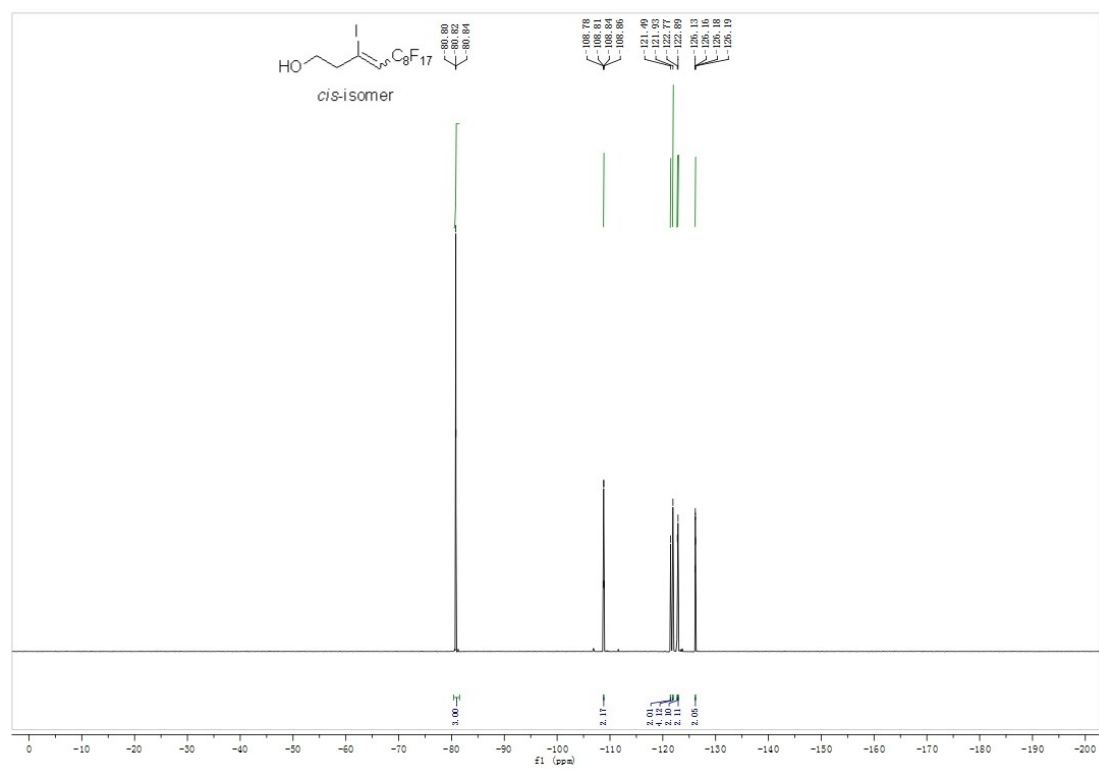

**(E)-6b-<sup>1</sup>H**

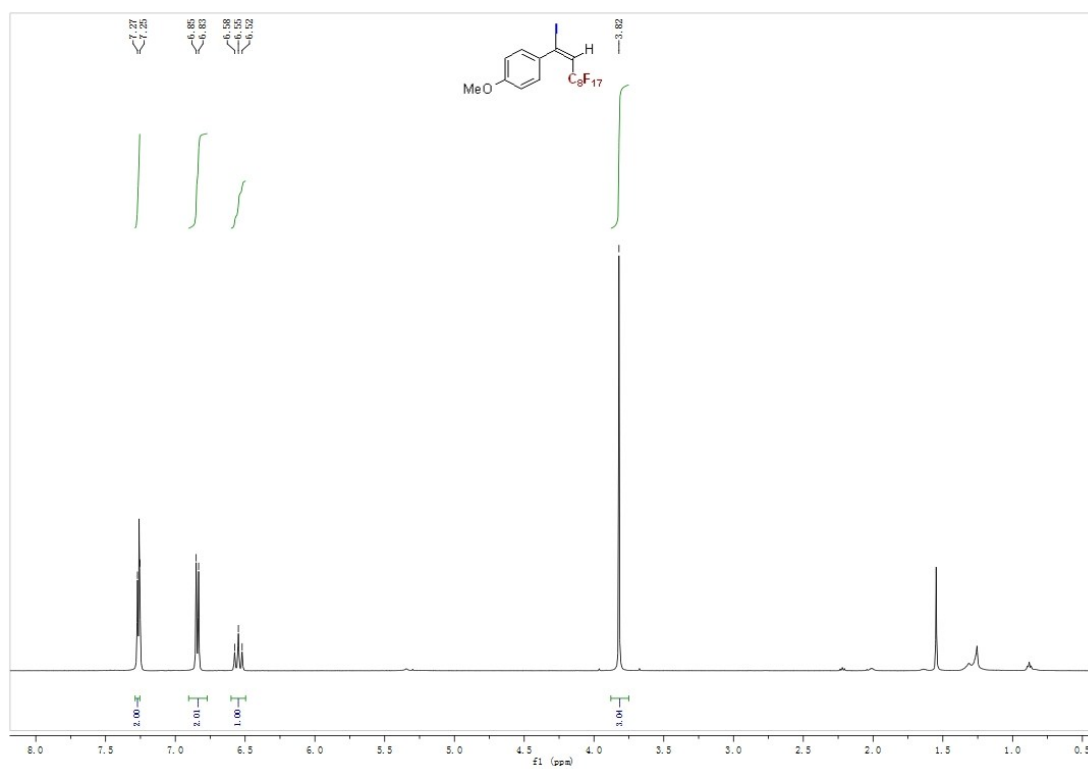

**(E)-6b-<sup>13</sup>C**

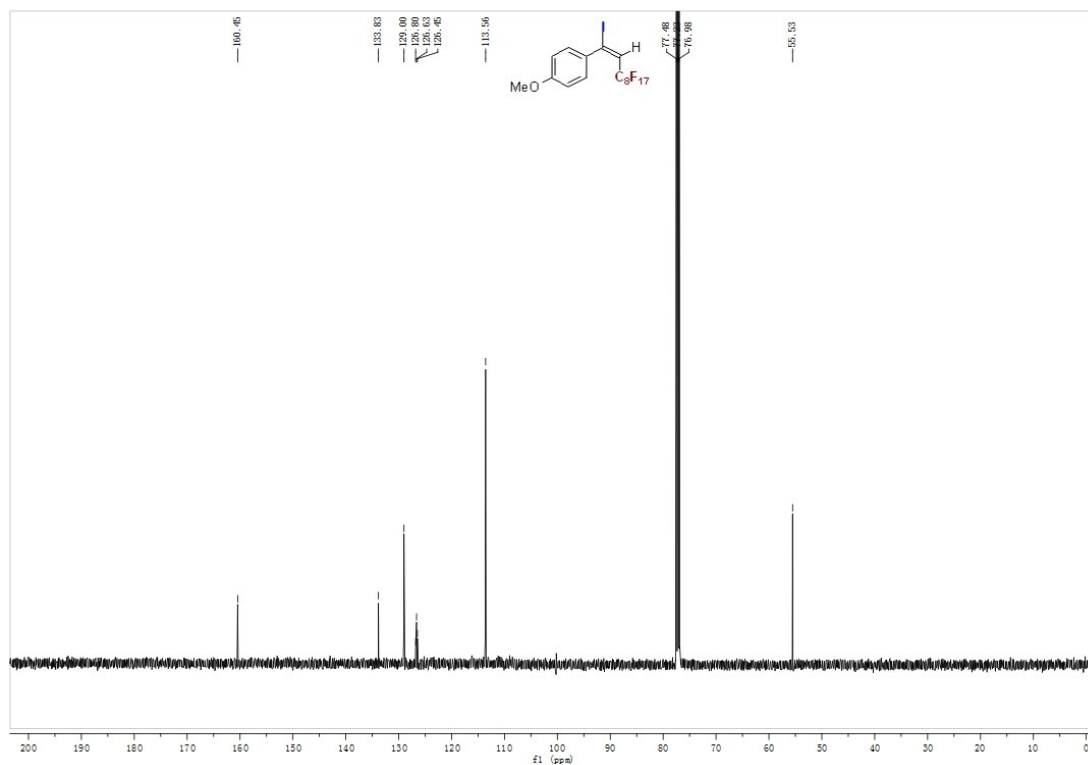

**(E)-6b-<sup>19</sup>F**

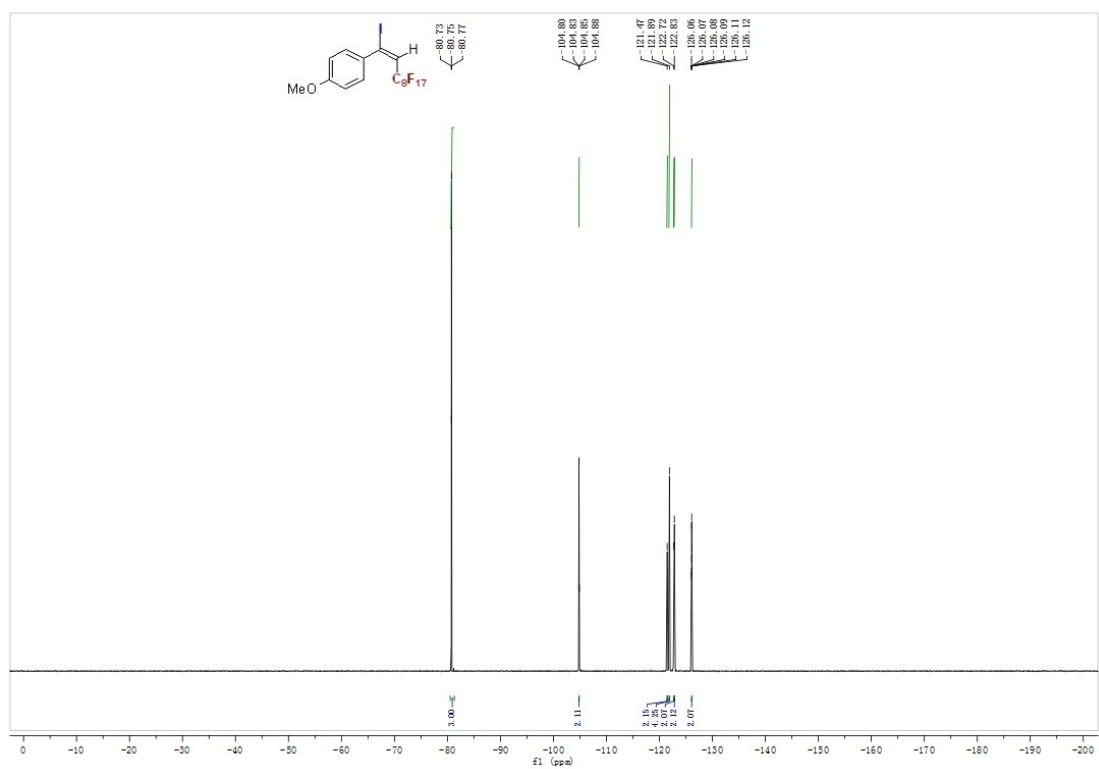

**(E)-6b-2D-NOESY**

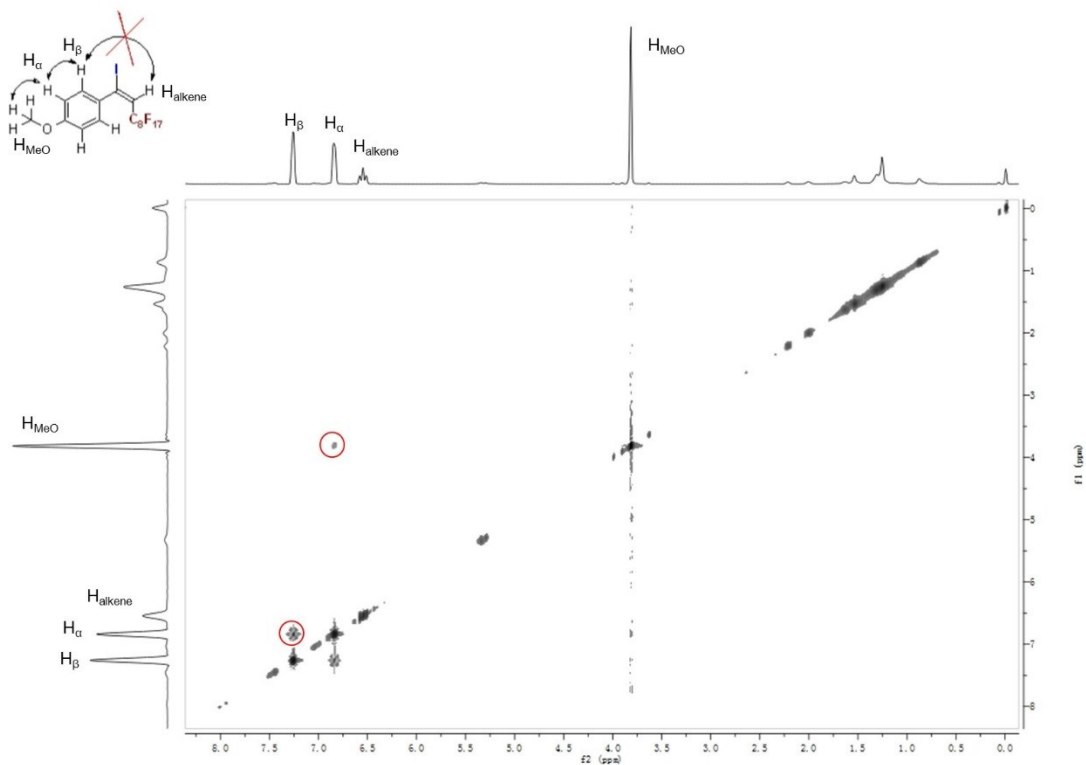

### 3m-<sup>1</sup>H

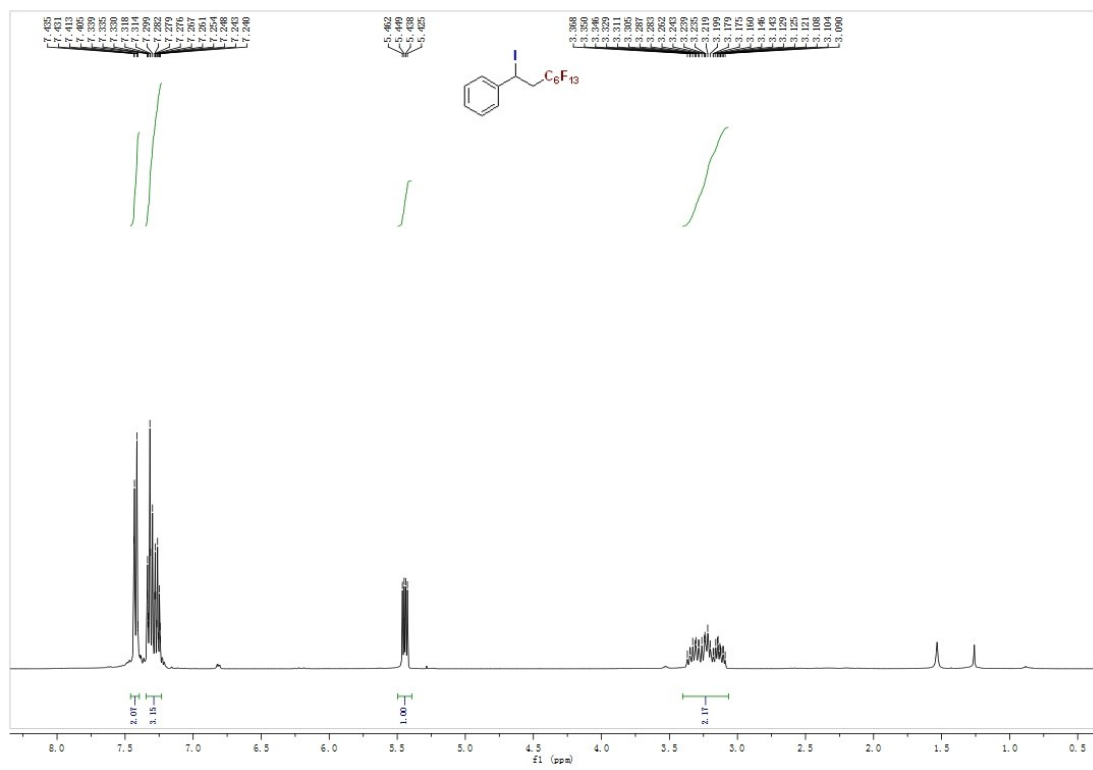

### 3m-<sup>13</sup>C

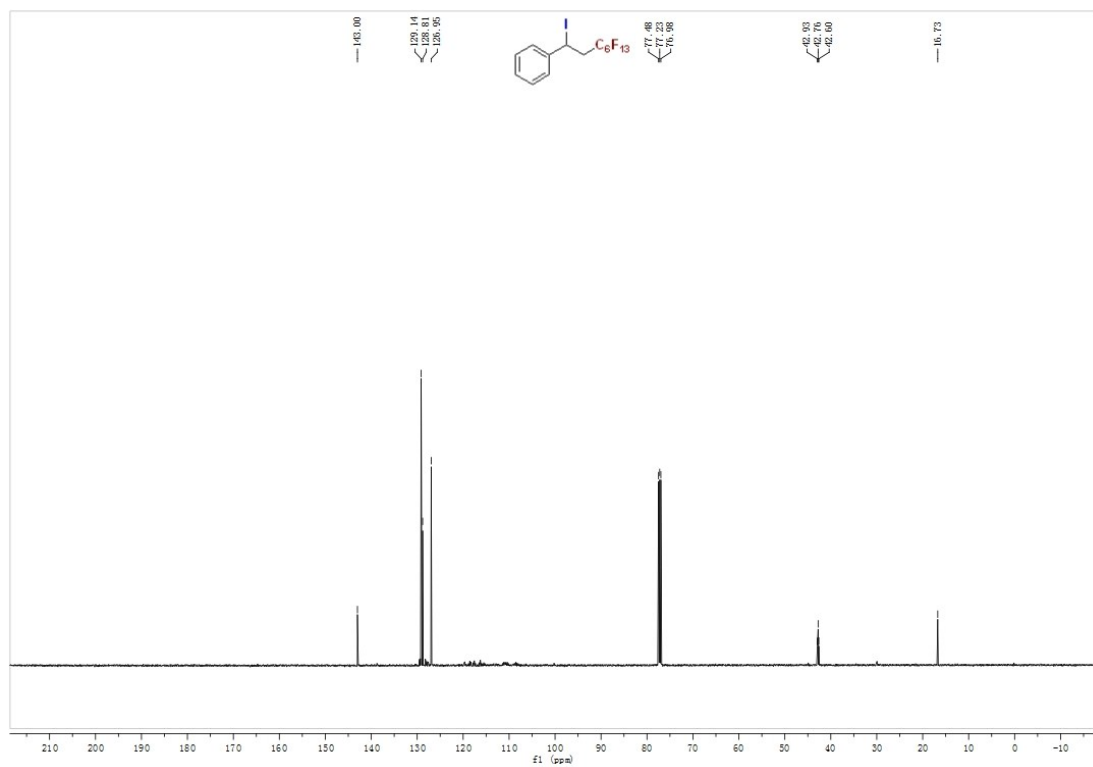

### 3m-<sup>19</sup>F

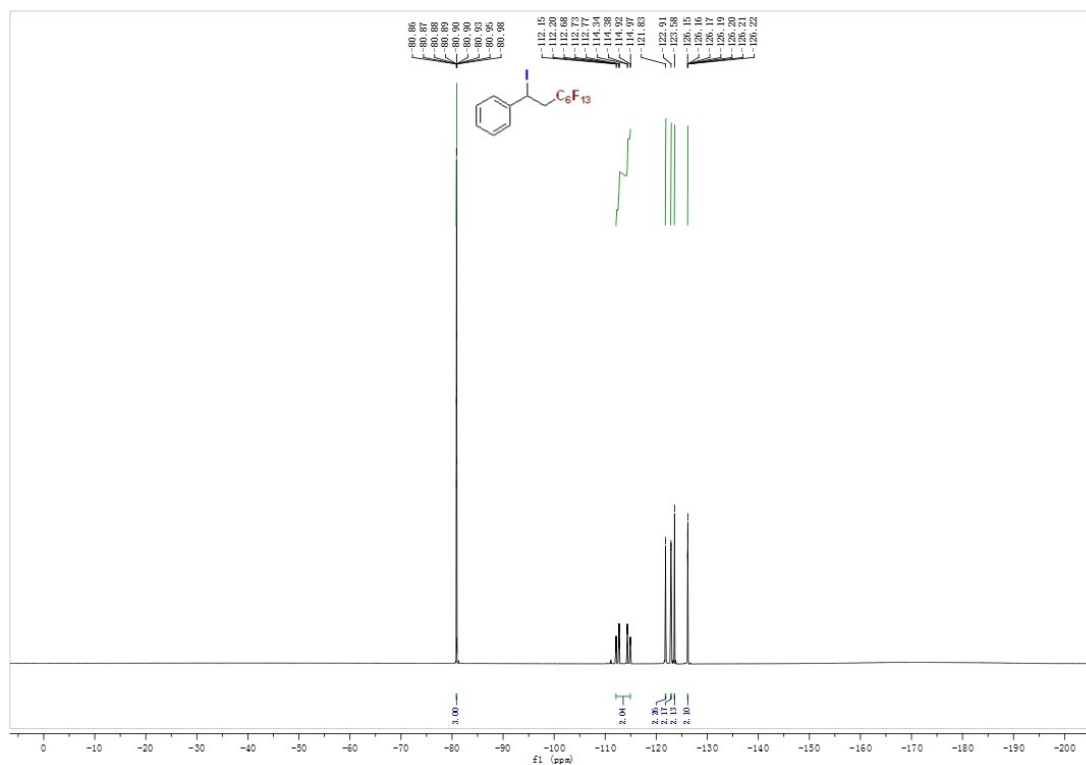

### 3m-HRMS

ztx180907-4 160 (2.652) Cm (159:167-58:79)

TOF MS EI+  
5.14e4

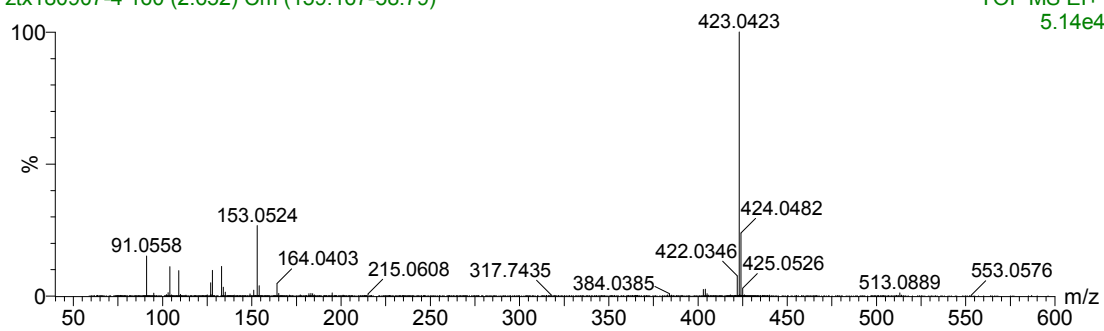





**(Z)-7a-<sup>19</sup>F**

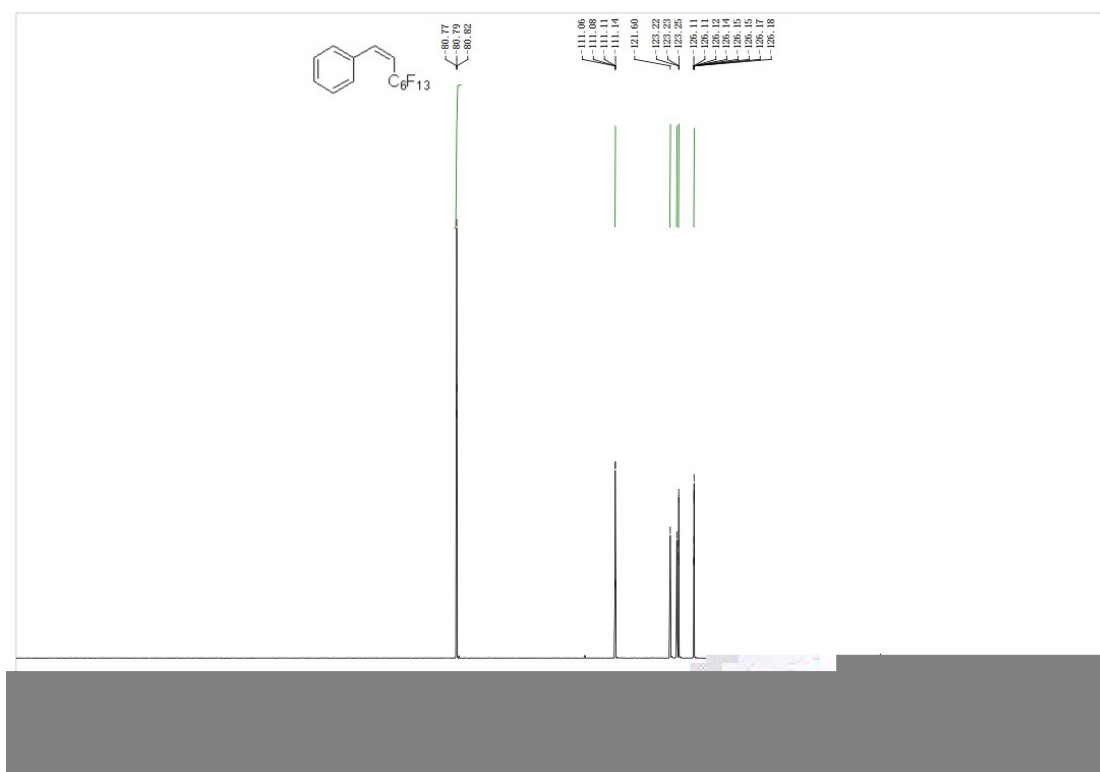

**(Z)-7a-2D-NOESY**

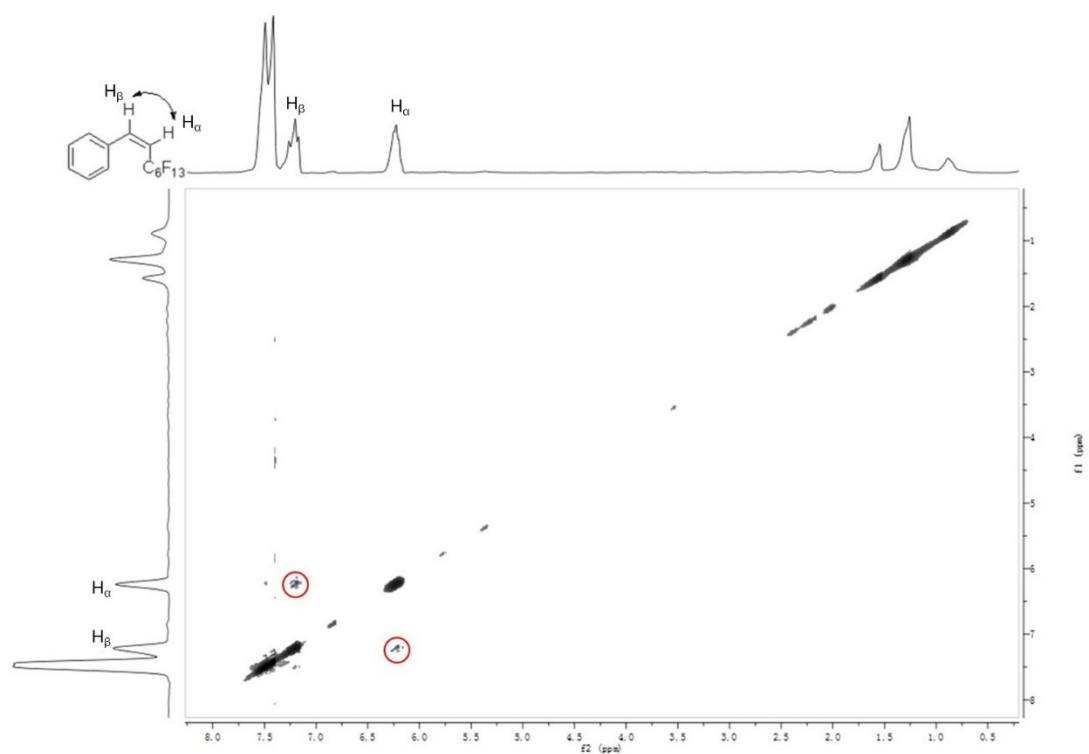

### (Z)-7b-<sup>1</sup>H

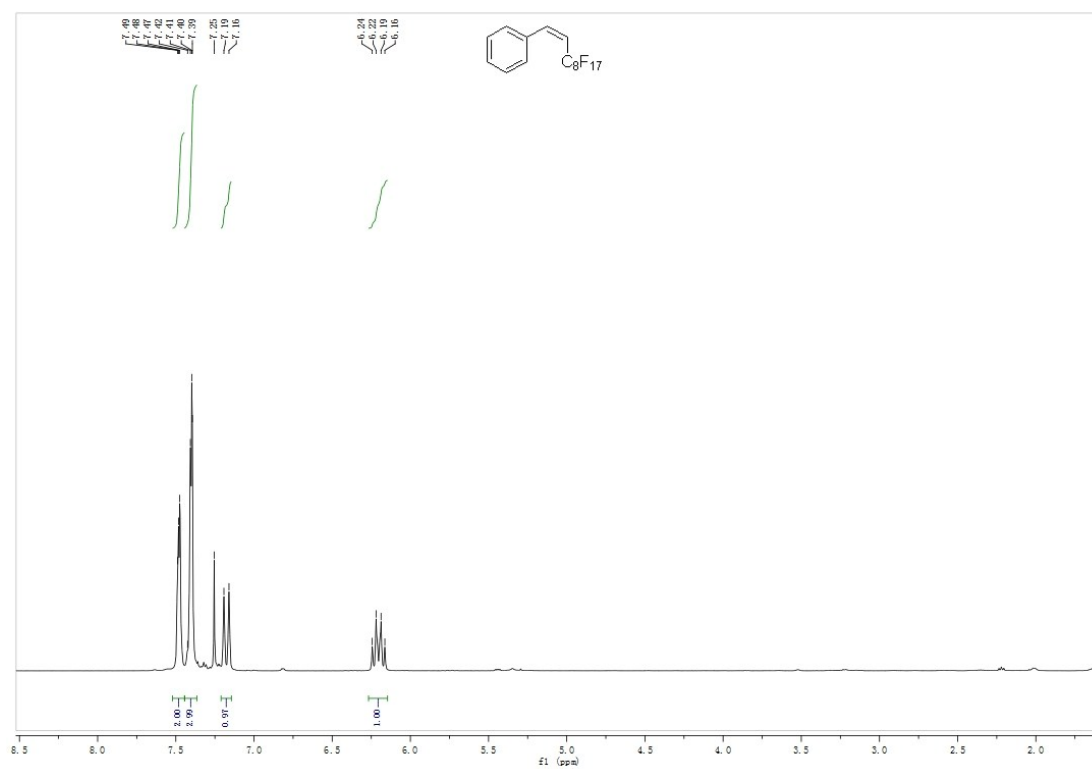

### (Z)-7b-<sup>13</sup>C

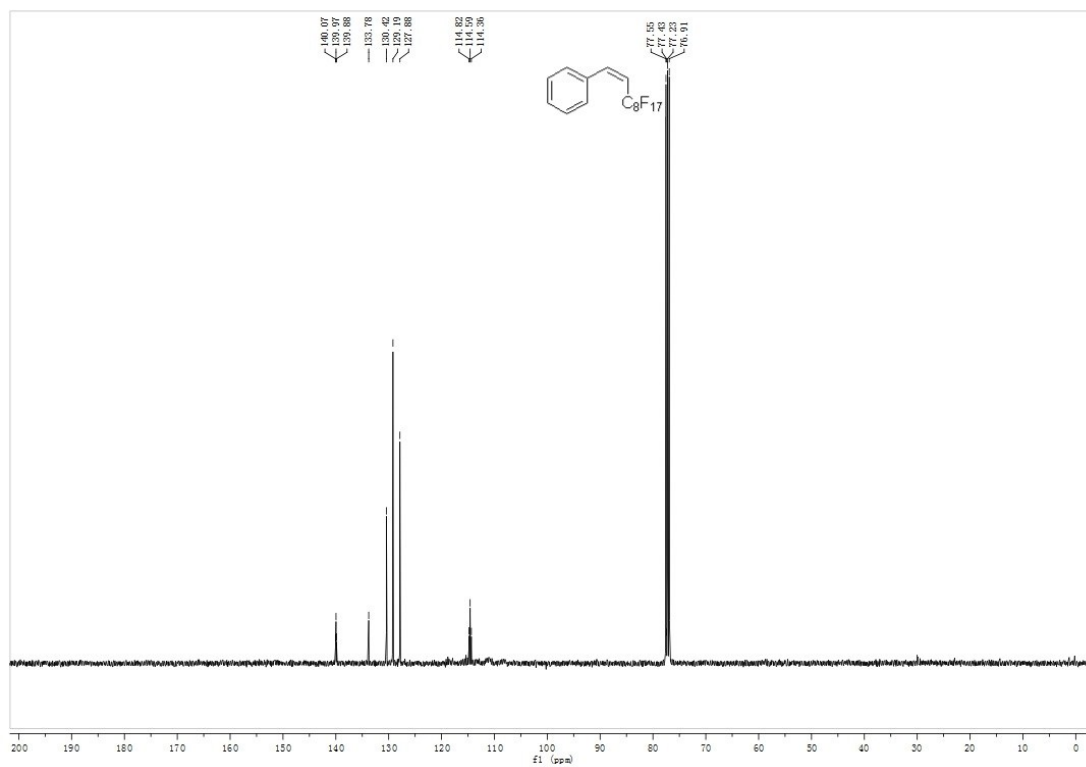

**(Z)-7b-<sup>19</sup>F**

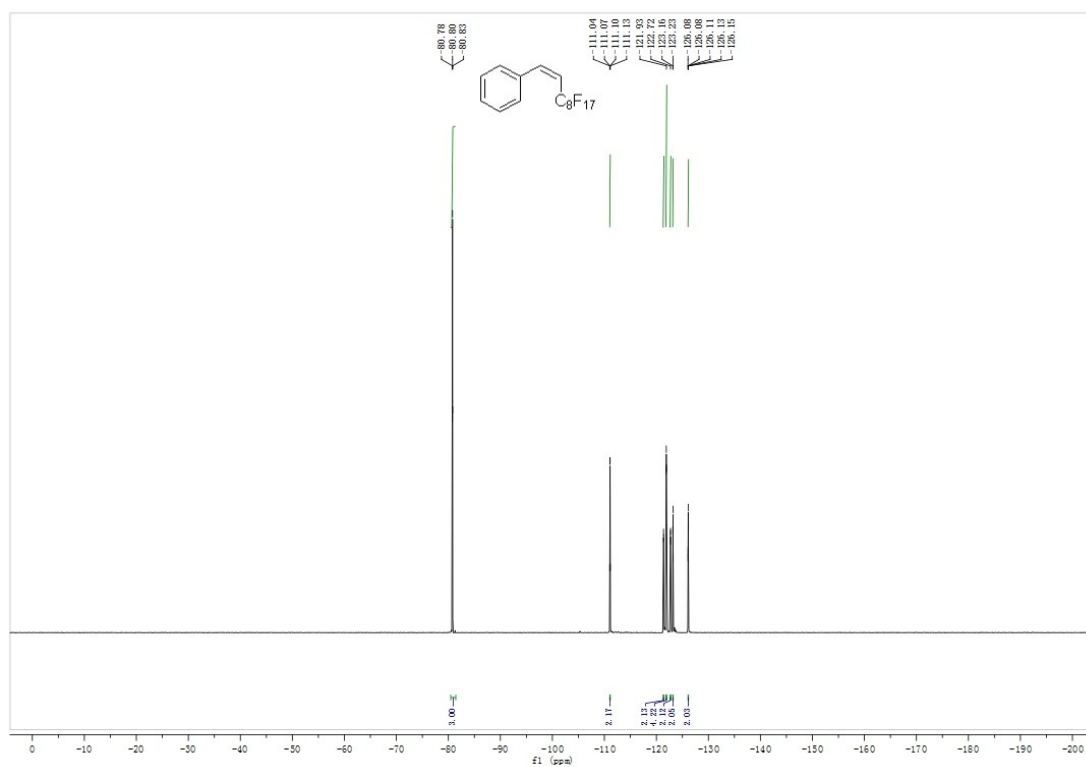

**(Z)-7b-2D-NOESY**

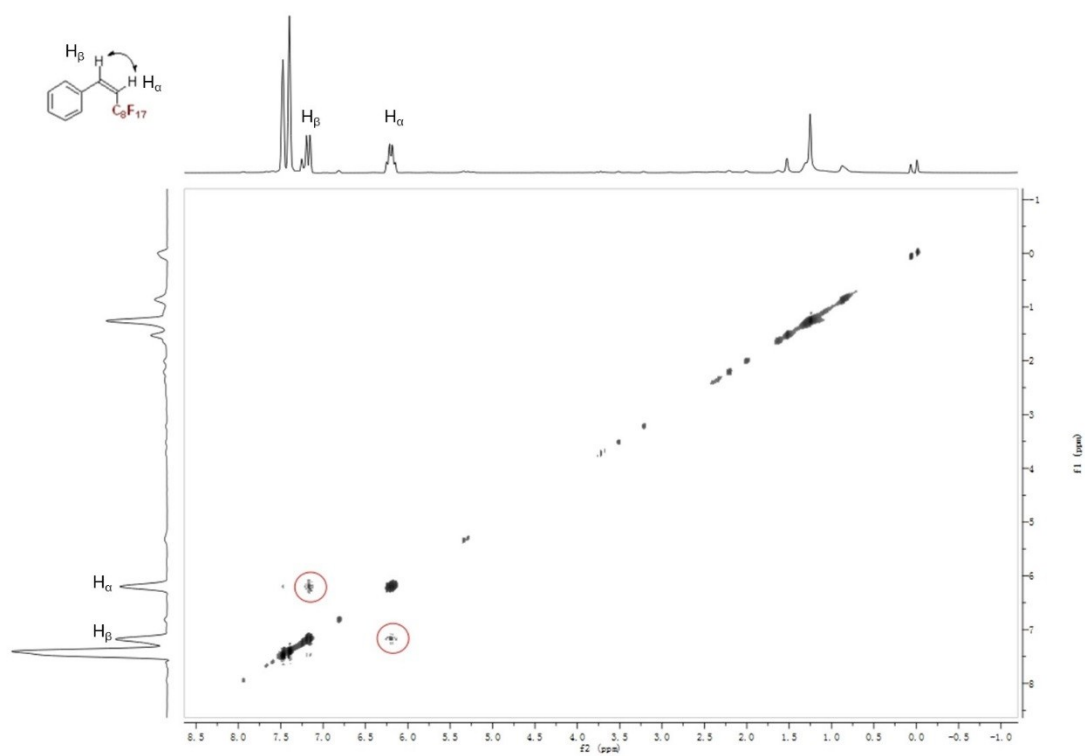

(Z)-7c-<sup>1</sup>H

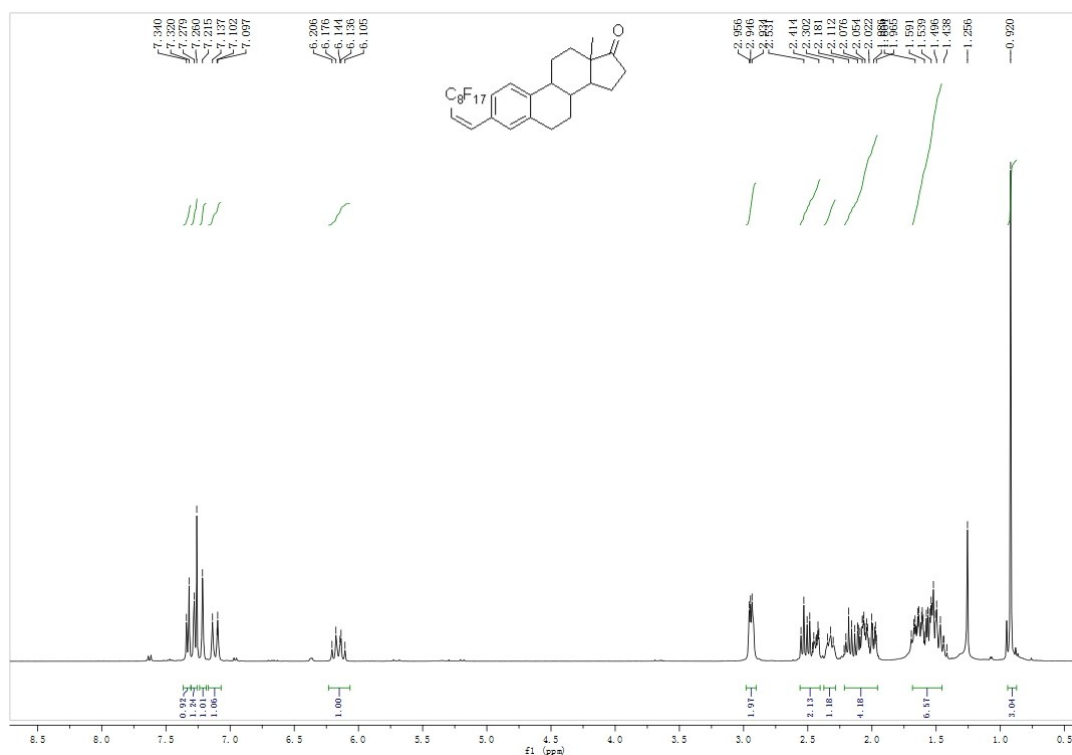

(Z)-7c-<sup>13</sup>C

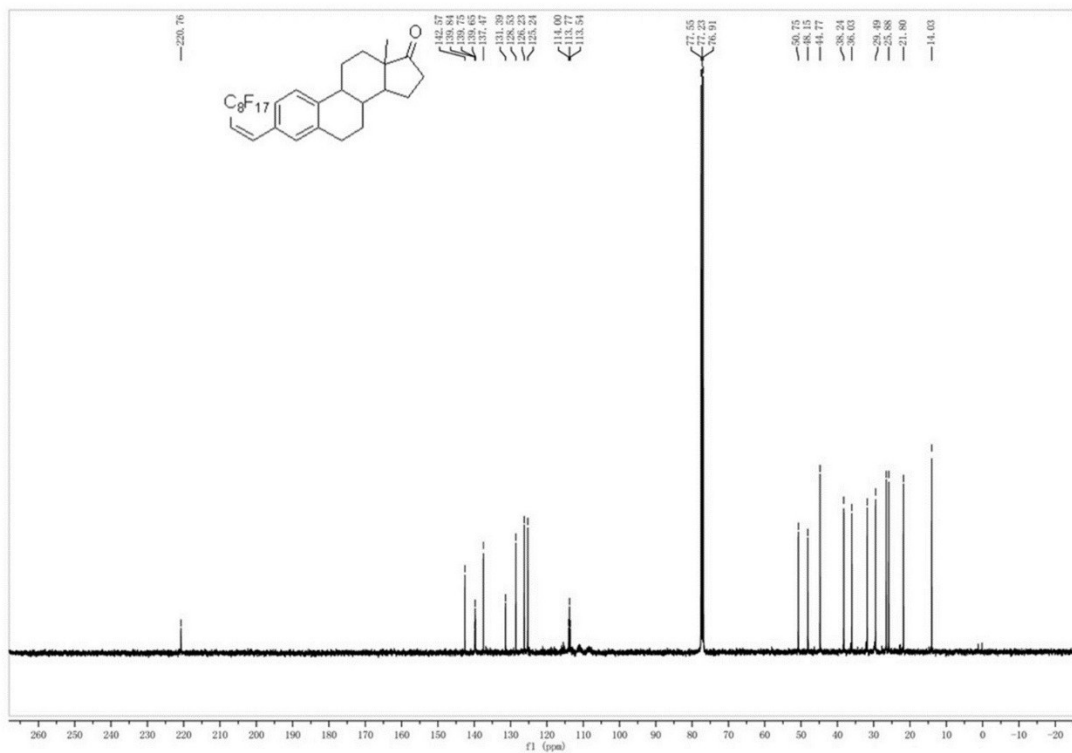

**(Z)-7c-<sup>19</sup>F**

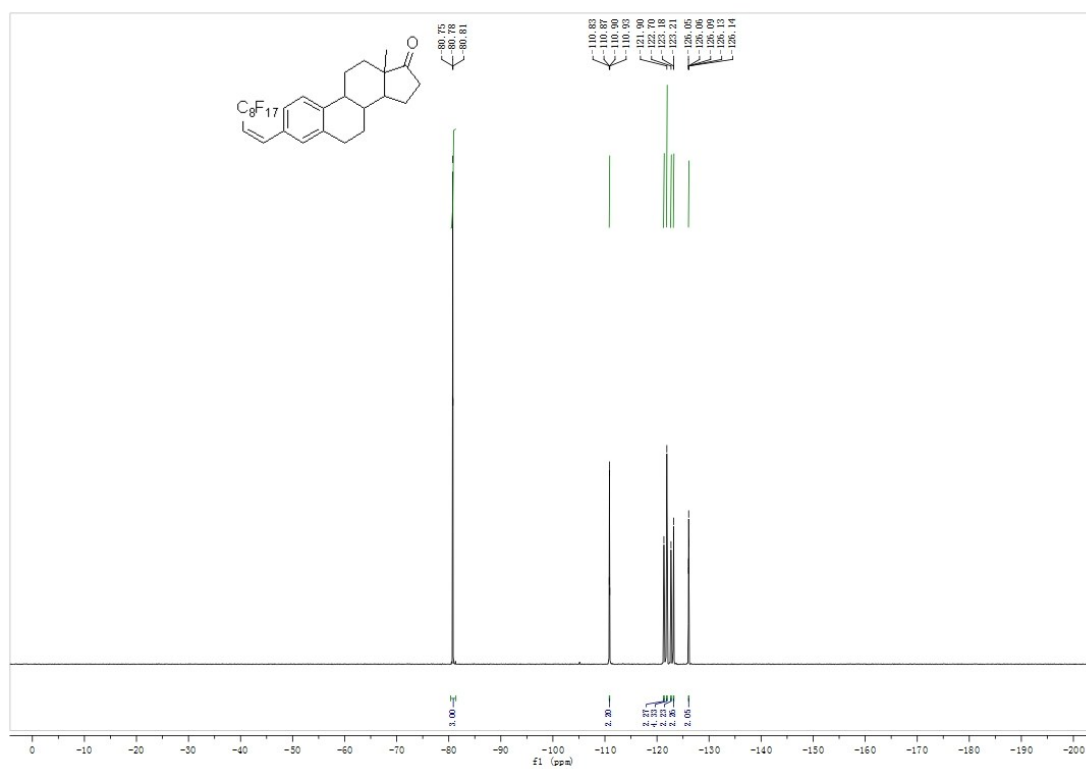

**(Z)-7c-2D-NOESY**

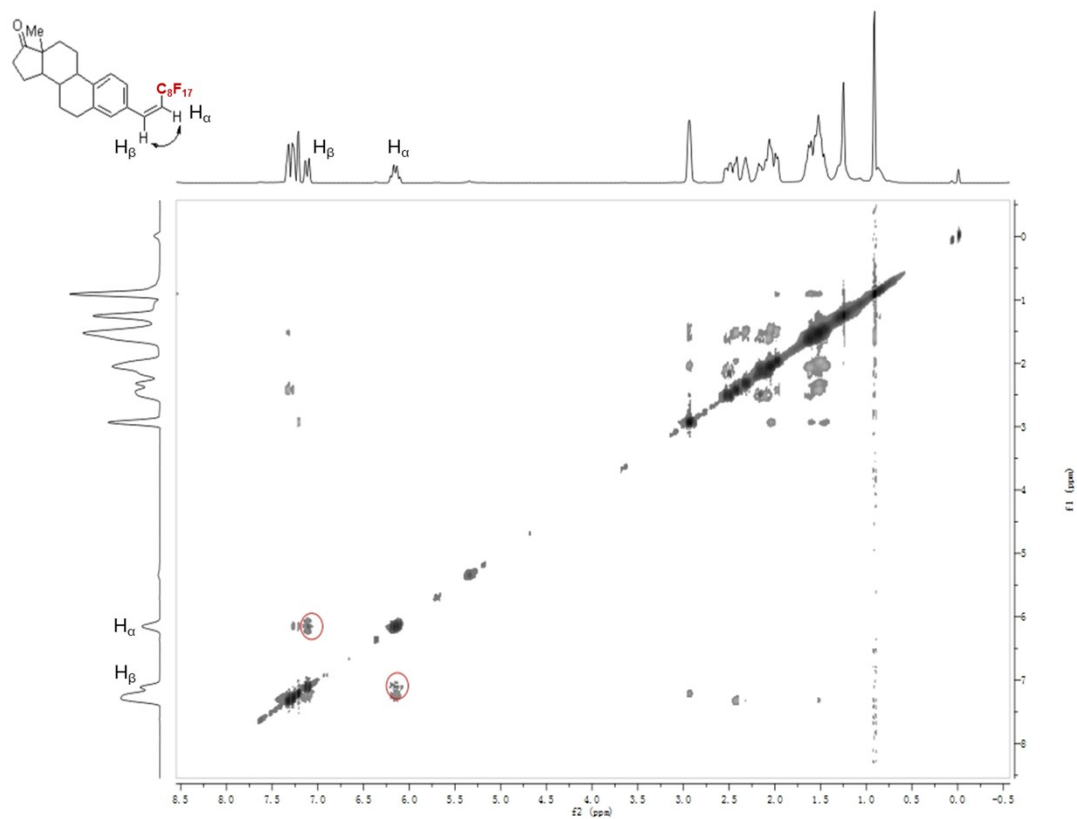

# (Z)-7c-HRMS

ztx180907-2 612 (10.186) Cm (612:642-384:455)

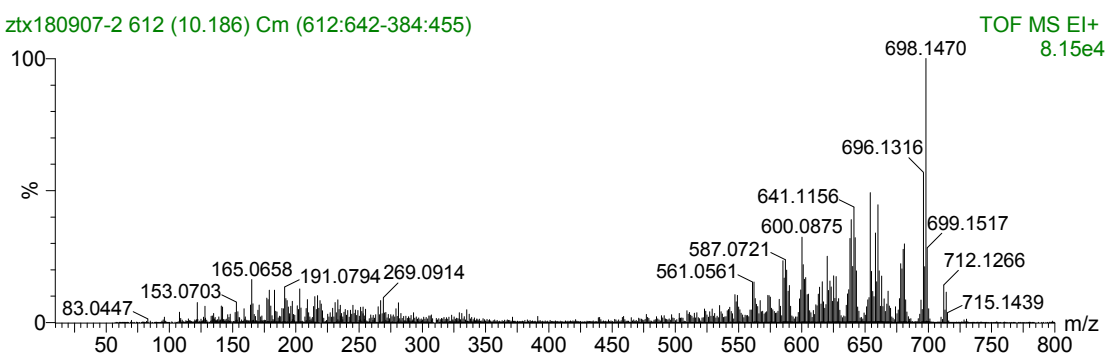

Supplement: c8ra06181e1.pdf [file c8ra06181e1.pdf]
